**An apical protein, Pcr2, is required for persistent movement by the human parasite  
*Toxoplasma gondii***

Jonathan Munera Lopez<sup>1</sup>, Isadonna F. Tengganu<sup>1</sup>, Jun Liu<sup>2,3</sup>, John Murray<sup>1</sup>, Luisa F. Arias Padilla<sup>1</sup>, Ying Zhang<sup>4</sup>, Laurence Florens<sup>4</sup>, Ke Hu<sup>1#</sup>

<sup>1</sup>Biodesign Center for Mechanisms of Evolution/School of Life Sciences, Arizona State University, USA

<sup>2</sup>Department of Biology, Indiana University, USA; <sup>3</sup>Current address: Berkgen Biopharmaceuticals, Shenzhen, China

<sup>4</sup>Stowers Institute for Medical Research, Kansas City, MO, 64110, USA

Running title: *Pcr2 important for persistent parasite movement*

#: Address correspondence to:

Email: kehu4@asu.edu

## ABSTRACT

The phylum Apicomplexa includes thousands of species of unicellular parasites that cause a wide range of human and animal diseases such as malaria and toxoplasmosis. To infect, the parasite must first initiate active movement to disseminate through tissue and invade into a host cell, and then cease moving once inside. The parasite moves by gliding on a surface, propelled by an internal cortical actomyosin-based motility apparatus. One of the most effective invaders in Apicomplexa is *Toxoplasma gondii*, which can infect any nucleated cell and any warm-blooded animal. During invasion, the parasite first makes contact with the host cell "head-on" with the apical complex, which features an elaborate cytoskeletal apparatus and associated structures. Here we report the identification and characterization of a new component of its apical complex, Preconoidal region protein 2 (Pcr2). Pcr2 knockout parasites replicate normally, but they are severely diminished in their capacity for host tissue destruction due to significantly impaired invasion and egress, two vital steps in the lytic cycle. When stimulated for calcium-induced egress, Pcr2 knockout parasites become active, and secrete effectors to lyse the host cell. Calcium-induced secretion of the major adhesin, MIC2, also appears to be normal. However, the movement of the Pcr2 knockout parasite is spasmodic and unproductive, which drastically compromises egress. In addition to faulty motility, the ability of the Pcr2 knockout parasite to assemble the moving junction is impaired. Both defects likely contribute to the poor efficiency of invasion. Interestingly, actomyosin activity, as indicated by the motion of mEmerald tagged actin chromobody, appears to be largely unperturbed in the absence of Pcr2, raising the possibility that Pcr2 may act downstream of or in parallel with the actomyosin machinery.

## INTRODUCTION

Cell movement allows cells to explore their environment, initiate physical interaction with other cells, and respond accordingly. Movement forms the basis of numerous processes such as embryonic development and the inflammatory response. For the thousands of species of apicomplexan parasites that are responsible for many devastating diseases (including malaria and acute toxoplasmosis), effective movement is integral to their parasitic lifestyle. For instance, upon injection into the human host by a mosquito, parasite motility enables the *Plasmodium* sporozoites to migrate through the skin tissue, and cross a blood vessel wall into the bloodstream to be carried to the liver, where the sporozoites leave the bloodstream and invade into liver cells [1]. Similarly, *Toxoplasma*, an extremely successful parasite that permanently resides in ~ 20% of the people on Earth and can infect any nucleated cell and any warm-blooded animal, relies on motility to shove its way into a host cell, as well as rapidly escape from an old exhausted host cell, disseminate, and reinvade into fresh new ones [2-6].

During invasion, the parasite first makes contact with the host cell "head-on" with its apical complex, which features an elaborate cytoskeletal apparatus and associated structures that contain both structural and signaling proteins critical for invasion [7-13]. The parasite rapidly enters the host cell while at the same time extensively modifying the host cell's plasma membrane at the entry point, and uses that modified membrane to form the parasitophorous vacuole that eventually completely envelops the intracellular parasite [14-27]. The integrity of the host plasma membrane and viability of the host cell are preserved during invasion, thus allowing for subsequent replication cycles during which the parasites exploit host resources for proliferation. Parasite exit (i.e. egress) on the other hand, is lethal for the host cell [3, 7, 28-30]. During *Toxoplasma* egress, the combination of pore formation by lytic proteins secreted from the parasite and mechanical disruption due to parasite moving through the host cell membrane results in destruction of the host cell, and allows parasite dissemination to initiate the next round of the lytic cycle. Successive cycles of parasite invasion, replication, and egress lead to extensive tissue damage such as seen in toxoplasmic encephalitis and congenital toxoplasmosis. Therefore, parasite motility not only is required to initiate an infection, but also directly contributes to the pathogenesis of the disease.

Infectious apicomplexan parasites move by gliding on a surface, propelled by an internal cortical actomyosin-based motility apparatus. Over the years, many labs have characterized key proteins involved in parasite motility [2, 6, 7, 12, 13, 31-38]. The functions of these proteins can be largely explained in the context of a working model [39], in which the internal motor activity powers parasite gliding via the coupling of the actomyosin machinery with transmembrane adhesin complexes (more in discussion). Here we report the discovery of a new apical complex protein, Preconoidal region protein 2 (Pcr2), which is required for effective movement. The loss of Pcr2 results in a motility phenotype not covered in the current working model.

Pcr2 is a novel protein located in the apical complex of the parasite. Knockout of Pcr2 results in stuttering, ineffective parasite movement, a phenotype that has not been observed before. Calcium stimulated basal accumulation of mEmeraldFP tagged actin chromobody (actin-Cb-mE) is not blocked in the Pcr2 knockout parasite. This suggests that Pcr2 does not regulate motility through actin polymerization or actomyosin activity, as both have been shown to be necessary for the basal accumulation of actin-Cb-mE to occur [13, 40]. The abnormal motility of the Pcr2 knockout parasite is associated with significantly reduced efficiency of

parasite egress, invasion, and destruction of host cells, indicating the importance of Pcr2 for the lytic cycle.

## RESULTS

### *Identification of new candidate pre-conoidal proteins using immunoprecipitation*

During invasion, the parasite initiates contact with the host cell with its apical complex [41-45]. The cytoskeletal apical complex contributes to parasite invasion both structurally and as a signaling center [7-13]. It is a striking cytoskeletal machine, formed of a truncated cone-like basket (the conoid) and a series of associated structures, including the intraconoid microtubules, the pre-conoidal rings and the apical polar ring (Figure 1A). Disruption of the conoid structure is linked to severely impaired parasite invasion [8, 10]. In *Toxoplasma*, the 14 conoid fibers, novel tubulin polymers shaped like folded ribbons, are organized into a left-handed spiral capped at the apical end by the pre-conoidal rings. The pre-conoidal rings have an intricate periodic structure (Figure 1B, *left* panel). They often remain attached to the conoid fibers even after the conoid is separated from the rest of the parasite cytoskeleton following detergent extraction and protease digestion (Figure 1B, *middle* and *right* panels). It is therefore conceivable that the pre-conoidal rings form the organizing center of the conoid.

Previously, we identified TgCentrin2 (CEN2), which localizes to the pre-conoidal rings and several other structures (the centrioles, peripheral annuli, and the basal complex), and plays an important role in parasite invasion and replication [45-47]. To identify other potential pre-conoidal proteins, we performed immunoprecipitation (IP) analysis using GFP-Trap and lysate from a knock-in parasite line that expresses eGFP-CEN2 from the endogenous locus [47] (Figure 2A). Multidimensional Protein Identification Technology (MudPIT) analysis identified with high confidence a number of proteins known to be localized to CEN2 containing structures (e.g. the centrioles, peripheral annuli, and the basal complex) (Table S1). In addition, three of the hypothetical proteins enriched in the IP fraction are localized to a structure that is apical and smaller in diameter compared to the conoid (Figure 2B-C), as predicted for proteins located at the pre-conoidal region. These proteins were thus named Pcr1 (TGGT1\_274160), Pcr2 (TGGT1\_257370), and Pcr3 (TGGT1\_231840). During our process of characterizing these proteins, a LOPIT (Localization of Organelle Proteins by Isotope Tagging) proteomics screen [48] confirmed the apical localization of Pcr1. We decided to focus on Pcr2, which was predicted to be strongly fitness conferring (phenotype score = -4.43) in a large-scale CRISPR-based screen [49], but had not been characterized.

Pcr2 is a novel protein. Blast search against the database of Non-redundant protein sequences (nr-NCBI), yielded no hit with E value more significant than 0.05 outside the *Sarcocystidae* family, or conserved domains with E value more significant than 1e-5. Alpha-fold [50] predicted with confidence (pLDDT>70) four extended alpha-helical regions that likely form a coiled-coiled structure for protein-protein interaction, with no predicted structure for much of the rest of the protein (Figure S1).

To fully determine the normal localization of Pcr2, we generated an endogenous 3' mNeonGreenFP tagged line (*Pcr2-mNeonGreen* 3'tag) by single-crossover homologous recombination, and a knock-in line (*mEmeraldFP-Pcr2* knock-in) by double-crossover homologous recombination (see below). The FP-Pcr2 fluorescence is concentrated at the apical end of the mature parasite (Figure 3A). FP-Pcr2 fluorescence is retained after



extraction with Triton-X100 (TX-100), and colocalizes with the preconoidal labeling of CEN2 (Figure 3B), indicating that, similar to CEN2 [45-47], Pcr2 is a stable component of the apical complex. The recruitment of Pcr2 to the preconoidal region is detectable when the nascent daughters first emerge in the mother, marked by the duplication of the spindle pole, the assembly of the tubulin-containing cytoskeleton that includes the conoid, and the growing cortical microtubules [44-46, 51](Figure 3C-D). In a small fraction of cells, a Pcr2-containing spot is also found close to the basal end of the parasite (Figure 3D, top row, arrowhead). The significance of this additional Pcr2 focus is unknown as it does not appear to consistently associate with any recognizable cellular structures.

*Pcr2 is important for the parasite lytic cycle and invasion, but its loss does not affect apical complex structure nor parasite replication.*

In the *mEmeraldFP-Pcr2* knock-in parasites, the endogenous *Pcr2* gene in the parental (RH $\Delta$ hx $\Delta$ ku80) parasite has been replaced with a LoxP flanked cassette that includes the *mEmeraldFP-Pcr2* coding sequence and a selectable marker, HXGPRT (Figure 4A, left panel). As described previously [7, 51-53], this arrangement was designed to allow for Cre recombinase-mediated excision of the region between the LoxP sites and thus generate a knockout mutant of the target gene. After transient expression of Cre recombinase, viable knockout mutant ( $\Delta$ *pcr2*) clones were generated from the *mEmeraldFP-Pcr2* knock-in parasites. This was drastically different from what had been observed with *Centrin2*, which is an essential gene (Numerous attempts of generating CEN2 knockout mutants using the same method all failed [47]).

$\Delta$ *pcr2* clones were identified based on loss of *mEmeraldFP-Pcr2* fluorescence, and confirmed with genomic PCR (data not shown). Two sets (a and b) of independently generated knock-in, and knockout lines were also analyzed by Southern blotting (Figure 4A, right panel), which proved that the *pcr2* loci in parental, *mEmeraldFP-Pcr2* knock-in, and  $\Delta$ *pcr2* parasites, are as predicted. Complemented parasite lines were generated from  $\Delta$ *pcr2* parasites by reintroducing the knock-in plasmid.

We examined the  $\Delta$ *pcr2* parasites using electron microscopy (EM) to determine the impact of loss of Pcr2 on the structure of the conoid. The parasites were incubated with the calcium ionophore A23187 (which increases intra-parasite [Ca<sup>2+</sup>] and induces conoid extension), followed by TX-100 treatment. We found that the loss of Pcr2 does not cause significant change in the morphology of the extended conoid (Figure 4B). However, loss of Pcr2 does have a strong impact on the lytic cycle. When the parental (RH $\Delta$ hx $\Delta$ ku80), *mEmeraldFP-Pcr2* knock-in,  $\Delta$ *pcr2*, or complemented parasites were allowed to infect confluent cultures of human foreskin fibroblasts (HFF) for nine days (Figure 4C), the  $\Delta$ *pcr2* parasites formed significantly fewer and smaller plaques. The cytolytic efficiency is restored in the complemented lines. The corresponding lines in sets a and b of knock-in, knockout, and complemented parasites behave similarly.

To determine specifically how Pcr2 knockout results in significantly reduced host cell destruction, we examined its impact on invasion, replication, and egress, the three components of the lytic cycle. By counting the number of parasites per vacuole at 12, 24, and 36 hours after infection, we found that the parental (RH $\Delta$ hx $\Delta$ ku80), *mEmeraldFP-Pcr2* knock-in,  $\Delta$ *pcr2*, or complemented parasites all replicate at a similar rate. Therefore, the loss of Pcr2 does not have a significant impact on parasite replication (Figure 5A).

### *Loss of Pcr2 results in significant defects in parasite invasion.*

To assess parasite invasion, we used an assay in which invaded (i.e., intracellular) and non-invaded (i.e., extracellular) parasites are distinguished based on accessibility of the parasite surface, before and after permeabilizing cells, to an antibody against a major surface antigen (SAG1) of the parasite [54, 55]. Consistent with the smaller number of plaques formed in the plaque assay, the invasion efficiency of  $\Delta pcr2$  parasites is significantly lower than the parental lines (Table 1). The invasion efficiency was restored in the complemented line.

### *Loss of Pcr2 results in significant defects in parasite egress.*

In contrast to the rapid dispersal of wild-type parasites after egress, in the  $\Delta pcr2$  cultures, clusters of parasites are often observed in the vicinity of a lysed vacuole, suggesting that these parasites do not egress efficiently. To examine parasite behavior during egress, we carried out time-lapse microscopy to monitor egress induced by calcium ionophore (A23187) (Figure 5B-C, Video S1). Unlike wild-type parasites,  $\Delta pcr2$  parasites in most vacuoles (37 out of 49 vacuoles) failed to disperse even 10 min after A23187 treatment (Figure 5B). For the parental, knock-in and complemented lines, it is common to observe reinvasion immediately after egress (Figure 5C, blue arrows). In contrast, reinvasion of egressed  $\Delta pcr2$  parasites was never observed in a substantially longer recording period (> 10 min), consistent with the low invasion efficiency demonstrated by the immunofluorescence-based assay (Table 1).

### *$\Delta pcr2$ parasites can secrete effectors to lyse the host cell during calcium-induced egress and the localization and secretion of the major adhesin, MIC2, are normal.*

Lysis of the host cell in response to elevated calcium [30] occurs normally in  $\Delta pcr2$  parasites. Shortly after the  $\Delta pcr2$  infected culture was exposed to A23187, nuclear labeling by a cell impermeant DNA binding dye (DAPI) included in the culture medium was detected within the now-permeable host cell. DAPI in the culture medium is not seen because its fluorescence is low until it binds to DNA. DAPI fluorescence first appears starting at the rim of the host cell nucleus, then spreads inwards (Figure 6A, Video S2). The host cell also showed other symptoms of lysing, including the roundup of mitochondria, blebbing and contraction (Videos S1-S2). Note that the dynamics of the DAPI binding captures the local nature of the initiation of host cell lysing, as the fluorescence always appears first on the side of the nucleus closer to the parasitophorous vacuole. The nuclei of neighboring uninfected host cells are not labeled by DAPI (Figure 6A), further confirming that the host cell lysing is a parasite driven process.

Efficient host cell lysing suggests functional secretion of micronemal lytic proteins by the parasite. To further confirm this hypothesis, we investigated the impact of Pcr2 knockout on microneme distribution and secretion directly by examining the intracellular distribution and A23187-induced secretion of Micronemal Protein 2 (MIC2), a major transmembrane adhesin important for parasite motility [36, 37, 56]. Immunofluorescence analysis showed no significant differences in MIC2 distribution between intracellular wild-type and  $\Delta pcr2$  parasites (Figure 6B). A23187-induced MIC2 secretion from the  $\Delta pcr2$  parasites is also not significantly different from the wild-type, knock-in and the complemented lines (Figure 6C-D). This indicates that the major egress defect seen in the  $\Delta pcr2$  parasite is not due to loss of adhesin secretion.

### *Δpcr2* parasites move spasmodically

Close examination of the behavior of the *Δpcr2* parasites revealed that these parasites do become motile shortly after treatment with 5  $\mu$ M A23187 (Video S1-S2). However, unlike the parental and complemented parasites, whose movements were highly effective and led to nearly synchronous dispersal, the motion of *Δpcr2* parasites was spasmodic and unproductive. Eventually some parasites manage to escape after vacillating multiple times before leaving the lysed vacuole. Previously, we discovered that another component of the apical complex, the Apical complex Lysine(K) methyltransferase (AKMT), is a main activator for parasite motility [7]. Knockout of AKMT leads to drastically impaired invasion and egress. Comparison between the *Δpcr2* and *Δakmt* parasites revealed that these two motility mutants behave quite differently (Figures 7-8). Both mutants respond to the A23187 treatment by lysing the host cells (Figure 8A, Video S6). However, while the *Δakmt* parasites were almost completely paralyzed after host cell permeabilization, the *Δpcr2* parasites were noticeably more active but moved fitfully. This indicates that these two apical proteins play different roles in parasite motility. The type of spasmodic motion observed in the *Δpcr2* parasites has not been reported in other previously characterized motility mutants [7, 12, 13, 31, 34, 35, 38].

The spasmodic motion of the *Δpcr2* parasite during egress is characterized by sudden forward movement followed by long pauses or backward sliding. This could be due to an inherent defect in maintaining directional parasite movement. Alternatively, it could be caused by a failure in overcoming resistance from the surrounding host subcellular structures. To examine the parasite motile behavior in a host-cell-free environment, we used a 3-D motility assay previously developed by the Ward Lab [57], in which the parasites are allowed to move in a 3D gel (Matrigel) that approximates the extracellular matrix of mammalian tissue. In the original form of the assay, parasite position was determined by nuclear tracking, enabled by nuclear labeling with the cell-permeant DNA dye Hoechst 33342 and fluorescence imaging with Ultraviolet (UV) excitation. We chose to use label-free Differential Interference Contrast (DIC) imaging to eliminate UV exposure to the parasite, and to enable imaging of any morphological changes the parasite undergoes while moving in the 3-D environment. Using a silicon-immersion objective, for which the refractive index of the immersion oil ( $n=1.405$ ) is close to that of the Matrigel ( $n\sim 1.34$ ), high-quality DIC images can be acquired throughout a region exceeding 100 microns in depth. As reported previously [57], motile wild-type parasites move along a helical path in the Matrigel (Figure 7). Often the movement continues over tens of microns, many body-lengths of the parasite. Interestingly, similar to what is seen during invasion of a host cell, a constriction was often observed traversing from the apical to the basal region of the moving parasite (Figure 7A, Video S3). This further validates the 3-D motility assay as a physiologically relevant analysis for *Toxoplasma*. As expected, the majority of the *Δakmt* parasites are immotile, consistent with the paralyzed behavior observed in the induced egress assay (Figure 7B-C). In contrast to the nearly immotile *Δakmt* parasites, the proportion of motile *Δpcr2* parasites was close to that of the wild-type parasites (Figure 7B). However, the movement of the *Δpcr2* parasite is noticeably less sustained (Videos S4-S5) with more frequent long pauses (indicated by arrows in Figure 7C), consistent with what was observed in the egress assay.

### *Loss of Pcr2 does not block actomyosin-based motion nor AKMT dynamics.*

*Toxoplasma* motility is driven by actin polymerization and associated myosin motors [2, 6, 7, 12, 31-35]. To investigate the dynamics of actin-containing structures, several groups have used an actin-chromobody tagged with a fluorescent protein (actin-Cb-mE or actin-Cb-GFPy) and found that the distribution of the tagged actin-Cb is sensitive to changes in intra-parasite

calcium concentration, induced by BIPPO, a cGMP phosphodiesterase inhibitor or the calcium ionophore, A23187 [13, 40, 58, 59]. The redistribution of actin-Cb in response to elevated calcium appears to be dependent on actin polymerization and myosin activity [13, 40]. Indeed, in live egress experiments, we observed that A23187 treatment induced an actin-Cb-mE accumulation at the basal end in 100% of the wild-type parasites (n= 127) (Figure 8B). In contrast, the actin-Cb-mE accumulation was not observed in ~ 58% of the  $\Delta akmt$  parasites (n=125) when treated with A23187. In the ~42% of A23187 treated  $\Delta akmt$  parasites that showed some basal concentration of actin-Cb-mE, the accumulation typically was not nearly as pronounced as observed in wild-type parasites. This is largely in agreement with a prior observation that BIPPO for the most part failed to induce actin-Cb-GFPTy basal accumulation when AKMT was knocked down [13]. We previously discovered that jasplakinolide, which stabilizes actin filaments, compensates the defect in magnitude of the cortical force generated by  $\Delta akmt$  parasites in laser trap measurements [60]. Thus, both lines of evidence suggest that AKMT might regulate parasite motility by controlling actin polymerization. While the  $\Delta pcr2$  parasites also have a pronounced motility defect, the basal accumulation of actin-Cb-mE occurred in 95% of these parasites (n= 159) when stimulated by A23187. This raises the possibility that Pcr2 acts downstream of or in parallel with the actomyosin machinery and AKMT. Consistent with this idea, we found that the loss of Pcr2 does not affect the apical localization of AKMT, and that the calcium-sensitive dispersal of AKMT from the parasite apex [7] still occurs in the  $\Delta pcr2$  parasites (Figure 8C).

#### *Spasmodic movement contributes to the invasion defect of $\Delta pcr2$ parasites*

Parasite motility is required for both egress and invasion. Many motility-relevant genes are involved in both processes. On the other hand, invasion does have its unique structural requirements [55, 61-64]. We were therefore curious to see whether an invading  $\Delta pcr2$  parasite displays a similar type of spasmodic motility as observed during egress and during movement in the 3-D matrix, and if so, how the fitful nature of the movement might affect the efficiency of invasion. To address this, we carried out live-cell imaging and specifically examined the action of parasites after they had initiated contact with a host cell. In these experiments, freshly harvested extracellular parasites were settled down onto the host cell monolayer by slow speed centrifugation or by a pre-incubation on ice. After parasites had settled down, the cultures were then imaged by time-lapse DIC microscopy at 37°C (Figure 9, Video S7). We then counted the number of invasion or attempted invasion events recorded in the videos for four parasite lines: wild-type, Pcr2-knock-in,  $\Delta pcr2$ , and complemented. We observed 264 events for wild-type, 194 for knock-in, 27 for  $\Delta pcr2$ , and 174 for complemented parasites. Of these, > 99% (i.e. 263 of 264) of the wild-type, ~ 98% of the knock-in and ~ 97% of the complemented parasites completed the invasion. In contrast, ~ 63% of the invasion attempts (17 of 27) by  $\Delta pcr2$  parasites stalled or were aborted after the parasite managed a partial entry (Figure 9D-E, Video S7).

The invading parasites observed in the time-lapse videos developed a constriction during entry, including some of the  $\Delta pcr2$  parasites that failed to complete invasion (Figure 9D-E, Video S7). Previous studies have shown that a ring-like moving junction forms at the site of the constriction that develops during normal parasite invasion [20, 61-67]. To determine whether the assembly of this moving junction occurs normally in the  $\Delta pcr2$  parasites, we examined the localization of RON4 (Rhoptry Neck Protein 4), which is found at the neck region of rhoptries in intracellular parasites and is recruited to the moving junction during parasite invasion [62, 64]. In quiescent intracellular parasites, there is no detectable difference in RON4 localization between knock-in and  $\Delta pcr2$  parasites (Figure 10A). To examine RON4



localization in invading parasites, we incubated wild-type, knock-in,  $\Delta pcr2$  or complemented parasites with host cells for a short period of time, fixed the cultures, incubated with a rabbit anti-SAG1 antibody (to label the part of the parasite plasma membrane not yet shielded by the parasitophorous vacuole), then detergent-permeabilized and incubated with a mouse anti-RON4 (to highlight the moving junction) plus a rat anti-GAP45 antibody (to label the Inner Membrane Complex (IMC) of the entire parasite) (Figure 10B). Parasites in these labeled cultures that had developed a constriction were first identified by DIC, and then imaged by fluorescence in the SAG1, RON4, and GAP45 channels. Four distinct patterns were observed: 1) SAG1 labeling predominantly on the parasite plasma membrane distal to the constriction (i.e., on the basal side) with a normal-looking RON4 ring at the constriction; 2) SAG1 labeling of the entire plasma membrane of the parasite with no detectable RON4 ring at the constriction, 3) SAG1 labeling of the entire plasma membrane of the parasite with a normal-looking RON4 ring at the constriction, 4) SAG1 labeling predominantly distal to the constriction with no detectable RON4 ring (Figure 10C-D). The latter two groups accounted for a small minority of the total and could reflect either technological limitations or true biological variation present in a very small fraction of parasites. The majority of the parasites were found in the first two groups. For the wild-type, knock-in, and complemented parasites, approximately 80% of the parasites that formed a constriction also assembled a well-defined RON4-marked moving junction at the constriction. In these parasites, the SAG1 antibody had access (before permeabilization with detergent) to only the extracellular portion of the parasite, indicating that the invaded portion of the parasite is well shielded by the parasitophorous vacuole and the moving junction. For  $\Delta pcr2$  parasites, that labeling pattern is seen in less than 30% of the parasites that form a constriction. In contrast, in more than 50% of the constricted  $\Delta pcr2$  parasites, RON4 labeling at the constriction was not detected and SAG1 labeling was seen over the entire parasite, indicating poor sealing of the parasitophorous vacuole, which could contribute to, or result from, compromised invasion.

## DISCUSSION

Apicomplexan motility is vital for host infection and parasite dissemination. To complete its life-cycle, a parasite has to navigate through complex intracellular and extracellular environments. Thus the parasite likely encounters a wide-range of mechanical properties: different combinations of permeability, pore size, elasticity, and friction, giving rise to large variations in the power output required of the parasite's motile apparatus. How this dynamic interplay between imposed load and motor output occurs remains an unexplored area, as the outcome of manipulating the previously known motility-relevant genes has been largely binary; i.e., motile vs. immotile [7, 12, 13, 31, 34, 35, 38]. While the current model [39] provides a valuable framework connecting the functions of many proteins involved in motility (e.g. the IMC-anchored myosin motors for generating internal force, actin polymerization for providing tracks for the motor, actin-binding adapter proteins for linking the actomyosin complex to the transmembrane adhesins), it reflects the binary nature of the genetic manipulation experiments in that it describes a 2-state motility apparatus: the motor is always either "ON" or "OFF".

Here we report a new motility phenotype, in which the parasite is motile, but the movement is intermittent and results in frustrated egress and invasion. One can imagine several possible causes for this type of behavior. For example, the defect could be primarily mechanical, such as an "engine" that is underpowered due to loss or malfunction of an important component. Another mechanical defect might be envisioned as a "broken

transmission” (i.e. the internal engine performs normally, but the force is not transmitted effectively to the parasite outer surface to generate traction). Arguing against the “wimpy motor” explanation is the observation that, at the molecular level, Pcr2 does not appear to have a strong impact on actin kinetics or actomyosin activity, as the knockout of Pcr2 does not affect the basal accumulation of actin-Cb-mE upon calcium ionophore treatment. Arguing against the “broken transmission” hypothesis is the observation of normal calcium-induced secretion of the major adhesin protein, MIC2 (part of the “transmission” in the motility apparatus) in the  $\Delta pcr2$  parasite. Of course it remains possible that other unknown adhesins or associated proteins involved in force transduction are affected by the loss of Pcr2. In either case, regardless of the protein molecules involved, the prediction is that the persistence of parasite movement would be load dependent. The motility apparatus could drive parasite movement when the load is low enough, but the movement would be stalled when the parasite encounters increased resistance. This hypothesis could be tested in the future by determining how the  $\Delta pcr2$  parasites move in different extracellular matrices with well-defined graduated stiffness and pore size.

Unexplained by either form of “mechanical defect” hypothesis is how Pcr2, located at the extreme apex of the parasite, would directly affect the motile apparatus, which is distributed along the parasite cortex. As an alternative to postulating a mechanical defect, the spasmodic motility could conceivably be a result of broken signaling. If sustained parasite movement requires a sustained activating signal, intermittent signaling would give rise to fitful movement. If this is the case, one would predict fitful movement of the  $\Delta pcr2$  parasite irrespective of the external load.

Aside from motility, the loss of Pcr2 also affects the assembly of the moving junction during invasion. In our experiments, imperfect moving junction assembly, as defined by RON4 labeling, is correlated with accessibility of the entire plasma membrane of the invading parasite, indicating poor sealing of the junction, as defined by antibody labeling of SAG1. This poor sealing might be an indication of poor parasite-host-cell adhesion, hence poor traction, thus contributing to the poor invasion efficiency of the  $\Delta pcr2$  parasite. On the other hand, frustrated invasion due to stalled movement could possibly have some negative feedback on proper assembly of the moving junction.

The discovery of Pcr2 and the analysis of its function open up new opportunities to determine how mechanical interactions with its environment impact parasite motility, and how the regulation or maintenance of persistence in parasite movement is functionally connected with and imposed onto the motility apparatus and other structures involved in invasion and egress. As Pcr2 is predominantly located at the pre-conoidal region, it is also a useful probe to help determine the role of the pre-conoidal rings as a whole in regulating parasite motility, as a signaling center for promoting persistent parasite movement, or as a mechanical facilitator for penetrating the barriers posed by the environment surrounding the parasite.

## **MATERIALS AND METHODS**

### *T. gondii*, host cell cultures, and parasite transfection

The maintenance of host cell and *T. gondii* tachyzoite parasite cultures, and parasite transfections, were carried out as previously described [51, 68, 69]. Confluent human foreskin fibroblasts (HFFs; ATCC# SCRC-1041, and HFF\_hTERT; ATCC# CRL-4001) monolayers in

Dulbecco's Modified Eagle's Medium (DMEM, VWR, 45000-316), supplemented with 1% (v/v) heat-inactivated cosmic calf serum (Hyclone, SH30087.3) and Glutamax (Life Technologies-Gibco, 35050061) were used to maintain parasite cultures. For light microscopy-based assays, African green monkey renal epithelial cells, (BS-C-1; ATCC# CCL-26) and rat aorta cells (A7r5 ; ATCC# CRL-1444) were used as host cells.

### Immunoprecipitation and Multidimensional Protein Identification Technology (MudPIT) analysis.

Immunoprecipitation experiments were performed as described in [53], using eGFP-CEN2 knock-in parasites [47] and Chromotek-GFP-Trap agarose beads (Cat#ACT-CM-GFA0050, Allele Biotechnology, CA). Protein samples were processed for MudPIT as described in [53]. MS/MS spectra were first searched using ProLuCID v. 1.3.3 [70] with a mass tolerance of 10 ppm for peptide and fragment ions. Trypsin specificity was imposed on both ends of candidate peptides during the search against a protein database containing 90240 human proteins (NCBI 2021-11-23 release) and 8311 *Toxoplasma gondii* proteins (NCBI 2021-11-05), as well as 426 common contaminants such as human keratins, IgGs and proteolytic enzymes. To estimate false discovery rates (FDR), each protein sequence was randomized (keeping the same amino acid composition and length) and the resulting "shuffled" sequences were added to the database, for a total search space of 180482 amino acid sequences. Combining all replicate runs, proteins had to be detected by at least 2 peptides and/or 2 spectral counts. Proteins that were subsets of others were removed using the parsimony option in DTASelect v. 1.9 [71] on the proteins detected after merging all runs. Proteins that were identified by the same set of peptides (including at least one peptide unique to such protein group to distinguish between isoforms) were grouped together, and one accession number was arbitrarily considered as representative of each protein group. NSAF7 v. 0.0.1 (<https://github.com/tzwen/kite/tree/master/windowsapp/NSAF7x64>), was used to create the final reports on all detected peptides and nonredundant proteins identified across the different runs and to calculate quantitative label-free distributed normalized spectral abundance factor (dNSAF) values for all detected protein/ protein groups [72]. Raw data and search results files have been deposited to the Proteome Xchange (accession: PXD029734) via the MassIVE repository and may be accessed at <ftp://MSV000088377@massive.ucsd.edu> with password Kehu-2021-11-13

### Cloning of plasmids

Genomic DNA (gDNA) fragments were amplified using gDNA templates prepared from RH $\Delta$ *hx* or RH $\Delta$ *ku80* $\Delta$ *hx* parasites [73, 74]; a kind gift from Dr. Vern Carruthers, (University of Michigan) using the Wizard Genomic DNA Purification Kit (Cat# A1120, Promega, Madison, WI). Coding sequences (CDS) were amplified using *T. gondii* complementary DNA (cDNA). See Table S2 for primers used in PCR amplification.

*ptubA1-mEmeraldFP-Pcr1*, *Pcr2*, or *Pcr3*: The coding sequences for *Pcr1*(TGGT1\_274160), *Pcr2* (TGGT1\_257370), *Pcr3* (TGGT1\_231840) were amplified by PCR using primers S1 and AS1 (*Pcr1*), S2 and AS2 (*Pcr2*), S3 and AS3 (*Pcr3*), digested with *Bam*HI and *Afl*III (*Pcr1*) or *Bgl*III and *Afl*III (*Pcr2* and *Pcr3*), and ligated between the *Bgl*III and *Afl*III sites of *ptubA1-mEmeraldFP-TUBA1*[68].



*ptubA1-mEmeraldFP-Pcr2\_V2*: The coding sequence for *Pcr2* was amplified by PCR using primers S4 and AS4, and inserted between the *Bgl*II and *Afl*III sites of *ptubA1-mEmeraldFP-TUBA1*[68] using the NEBuilder HiFi Assembly kit (New England Biolabs, #E2621S).

*pTKO2\_II-mEmeraldFP-Pcr2* (for generation of *mEmeraldFP-Pcr2* knock-in parasites): ~1.9 kb fragments upstream (5'UTR) or downstream (3'UTR) of the *Pcr2* genomic locus were amplified from the parasite genomic DNA by PCR using primers S5 and AS5 (5'UTR) and S6 and AS6 (for 3' UTR) and inserted between the *Not*I-*Xho*I (5'UTR) and *Hind*III-*Nhe*I (3'UTR) sites of the *pTKO2-II-mCherryFP* [53] using the NEBuilder HiFi Assembly kit. The vector backbone of the resulting vector was used to generate *pTKO2\_II-mEmeraldFP-Pcr2*, into which the CDS for *mEmeraldFP-Pcr2*, PCR amplified using primers S7 and AS7 from *ptubA1-mEmeraldFP-Pcr2\_V2*, was HiFi assembled between the *Asi*SI and *Rsr*II sites. A linker sequence coding for SGLRS was added in between the *Pcr2* and *Emerald* coding sequences, and the Kozak sequence from the endogenous *Pcr2* locus (TATTACCAGTGAAatg) was added to the 5' end of the *mEmerald* coding sequence. The backbone of the *pTKO2\_II-mEmeraldFP-Pcr2* plasmid contains a cassette driving expression of cytoplasmic *mCherryFP*, to help identify and exclude non-homologous or single homologous recombinants.

*pPcr2-mNeonGreenFP-LIC-DHFR* (for 3' endogenous tagging of *Pcr2* with *mNeonGreenFP*): was generated by HiFi assembly using three components, including the vector backbone, Exon 6 of *Pcr2*, and a CDS for *mNeonGreenFP*. The vector backbone was generated from *pYFP-LIC-DHFR* (a kind gift from Dr. Vern Caruthers, University of Michigan) digested with *Pac*I and *Bss*HII. Exon 6 of *Pcr2* without the stop codon was amplified from *T. gondii* genomic DNA with primers S8 and AS8. The CDS for *mNeonGreenFP* was amplified using primers S9 and AS9 from plasmid *pmNeonGreenFP-N1* (a kind gift from Dr. Richard Day, Indiana University) [75].

### Generation of knock-in, endogenously tagged, knockout, complemented, and transgenic parasites

*3' endogenously tagged Pcr2-mNeonGreenFP parasites*: RH $\Delta$ *ku80* $\Delta$ *hx* (~1 x 10<sup>7</sup>) were electroporated with 40  $\mu$ g of the endogenous tagging plasmid *Pcr2-LIC-mNeonGreenFP* linearized by *Bst*Z17I within exon 6. Parasites were selected with 1  $\mu$ M pyrimethamine, then cloned by limiting dilution. Five clones were tested with diagnostic genomic PCRs to confirm that the *pcr2* locus had been fused with the CDS for *mNeonGreenFP*. One clone was further confirmed by Southern blot (Figure 4A)

*mEmeraldFP-Pcr2 knock-in parasites*: approximately (~1 x 10<sup>7</sup>) RH $\Delta$ *hx* $\Delta$ *ku80* parasites were electroporated with 40  $\mu$ g of *pTKO2\_II-mEmeraldFP-Pcr2* linearized with *Not*I and selected with 25  $\mu$ g/mL mycophenolic acid and 50  $\mu$ g/mL xanthine. Clones were screened by fluorescence for *mEmeraldFP* concentration at the apical end of the parasites and for lack of the marker for non-homologous insertion (cytoplasmic *mCherry* fluorescence), and confirmed with diagnostic genomic PCRs. Two clones (KI-a and KI-b) were further verified by Southern blot and were used in the generation of  $\Delta$ *pcr2* parasites (Figure 4A).

*$\Delta$ pcr2 parasites*: *mEmeraldFP-Pcr2* knock-in parasites (~1 x 10<sup>7</sup>) were electroporated with 30  $\mu$ g of *pmin-Cre-eGFP\_Gra-mCherry* [51], selected with 80  $\mu$ g/mL of 6-thioxanthine, and screened for the loss of *mEmerald* fluorescence. Clones were confirmed by diagnostic

genomic PCRs. Two clones (KO-a and KO-b, derived from KI-a and KI-b, respectively) were further verified by Southern blot (Figure 4A).

*Δpcr2:mEmeraldFP-Pcr2 complemented parasites:* *Δpcr2* parasites ( $\sim 1 \times 10^7$ ) were electroporated with 40  $\mu\text{g}$  of pTKO2\_II-mEmeraldFP-Pcr2 linearized with *NotI*, and selected with 25  $\mu\text{g}/\text{mL}$  mycophenolic acid and 50  $\mu\text{g}/\text{mL}$  xanthine.

#### Generation of rat TgCEN2 and TgGAP45 antibodies

Purified recombinant TgCEN2 (TogoA.00877.b.A2.PW30868) and TgGAP45 (TogoA.17128.a.A1.PW28089) proteins were kindly provided by the Seattle Structural Genomics Center for Infectious Disease (Seattle, WA), and used to inject rats for antibody production (Cocalico Biologicals, Inc). Sera of the immunized animals were harvested for performing the immunofluorescence labeling of TgCEN2 and TgGAP45.

#### Southern blotting

Southern blotting was performed as previously described [51, 53] with the following modifications. To probe and detect changes in the *pcr2* genomic locus in the parental (RH $\Delta ku80\Delta hx$ ), 3' endogenously tagged *Pcr2-mNeonGreenFP*, *mEmeraldFP-Pcr2* knock-in parasites, *Δpcr2* parasites, and complemented parasites, 5  $\mu\text{g}$  of gDNA from each line was digested with *RsrII* for hybridization with a CDS probe, and with *NcoI* for hybridization with a 3'UTR probe. To generate the CDS probe, a CDS fragment was released from the plasmid pTKO2\_II-mEmeraldFP-Pcr2 by *RsrII* digestion, gel-purified, and used as a template in probe synthesis by nick translation. To generate the 3'UTR probe, a fragment specific for the region downstream from the last *pcr2* exon was released from the plasmid pTKO2\_II-mEmeraldFP-Pcr2 by *AflIII* and *HpaI* digestion, gel-purified, and used as a template in probe synthesis.

#### Plaque assay

One hundred freshly harvested parasites per well were used to infect confluent HFF monolayers grown in 6-well plates. After incubation at 37°C for 9 days, the cultures were rinsed with PBS, fixed with 70% ethanol for 15 min, stained with 2% (w/v) crystal violet, rinsed with PBS, air-dried and scanned using an Epson Perfection V500 photo scanner.

#### Wide-field deconvolution microscopy

Image stacks were acquired at 37°C using a DeltaVision imaging station (Applied Precision). Deconvolution of the image stacks was carried out using Softworx (Applied Precision). Images were contrast adjusted to optimize their display.

#### Immunofluorescence assay

For intracellular parasites, *T. gondii*-infected HFF monolayers growing in MatTek glass-bottom dishes (MatTek Corporation, CAT# P35G-1.5-14-C or CAT# P35G-1.5-21-C) were fixed in 3.7% (w/v) formaldehyde in PBS for 15 min, permeabilized with 0.5% (v/v) Triton X-100 (TX-100) in PBS for 15 min, blocked in 1% (w/v) bovine serum albumin (BSA) in PBS for 30-60 min, followed by antibody labeling (see below). Dishes were incubated in primary antibodies

for 30-60 min followed by washing and incubation in secondary antibodies for 30-60 min unless otherwise noted. Primary antibodies and dilutions used were as follows: mouse anti-IMC1, 1:1,000 (a kind gift from Dr. Gary Ward, University of Vermont); mouse 6D10 anti-TgMIC2 antibody [76] (a kind gift from Dr. Vern Carruthers, University of Michigan), 1:1,000; mouse anti-TgRON4 (a kind gift from Dr. Maryse Lebrun, Université de Montpellier, France), 1:1,000; rat anti-TgGAP45 (this study), 1:500; rat anti-AKMT, 1:1,000 [7]. Secondary antibodies and dilutions used were: goat anti-mouse IgG Alexa350, 1:1,000 (Molecular Probes); goat anti-rat IgG Cy3, 1:1,000 (Jackson ImmunoResearch, 112-165-167). All immunofluorescence labeling steps were performed at room temperature.

For labeling of TgCEN2 in extracellular *Pcr2-mNeonGreenFP* parasites, parasites were allowed to attach to poly-lysine coated MatTek glass-bottom dishes, permeabilized with 0.5% TX-100 in PBS for 15 min, fixed in 3.7% (w/v) formaldehyde in PBS for 15 min, then blocked with 1% (w/v) BSA for 30min. The samples were then incubated with rat anti-TgCEN2, 1:500 (this study) for 60 min, followed by goat anti-rat IgG Cy3 secondary antibody at 1:1,000 for 60 min.

#### Replication assay

Intracellular replication assay was performed as described in [7]. The replication rate was calculated using the method described in [77]. Four independent experiments were performed. In each replicate, the number of parasites in ~ 100 vacuoles was counted for each strain at each time point.

#### Invasion-related assays

To quantify differences in invasion efficiency at the population level, immunofluorescence-based invasion assays were performed and analyzed as previously described [54, 55] with some modifications.  $\sim 5 \times 10^6$  freshly egressed parasites were used to infect a MatTek dish of a nearly confluent monolayer of HFF cells. After 10 min incubation on ice and then 1 hr incubation at 37°C, the dishes were washed with PBS and fixed with 3.7% (w/v) formaldehyde for 15 min. To label the extracellular parasites, the samples were blocked with 1% (w/v) BSA in PBS for 30 min and incubated with a rabbit antibody that recognizes the *Toxoplasma* surface antigen 1 (TgSAG1) (a kind gift from Dr. Lloyd Kasper, Dartmouth College) at 1:2,000 dilution for 30 min, followed by goat anti-rabbit IgG Alexa 568 at 1:1,000 dilution for 30 min. To label both extracellular and intracellular parasites, cells were then permeabilized with 0.5% (v/v) TX-100 in PBS for 30 min, blocked with 1% (w/v) BSA in PBS for 30 min, incubated with the same rabbit anti-TgSAG1 antibody at 1:2,000 dilution for 30 min, followed by goat anti-rabbit IgG Alexa 488 (Molecular Probes) at 1:1,000 dilution for 30 min. The samples were imaged using an Olympus 20X objective. Ten full field images per sample were collected for each of three independent experiments. Fields were randomly selected using the Alexa 488 channel. Parasites that were labeled with both Alexa 568 and Alexa 488 were scored as uninvaded (*i.e.* extracellular), and parasites that were labeled with Alexa 488 only were scored as invaded (*i.e.* intracellular).

To analyze the behavior of live parasites during invasion, extracellular parasites were used to infect a MatTek dish of a nearly confluent monolayer of BS-C-1 cells. The dishes were gently centrifuged at 1,000 rpm (Eppendorf Centrifuge 5910R) for 4min at 10°C, or incubated on ice

for ~10 min, to facilitate parasite settling on the host cells. The culture was then imaged at 37°C at 1 sec intervals to capture invasion events.

To analyze the assembly of the moving junction in invading parasites, extracellular parasites were used to infect a MatTek dish of a nearly confluent monolayer of BS-C-1 cells. After ~ 10 min incubation on ice and then 4 - 9 min incubation at 37°C, the dishes were washed with PBS and fixed with 4% (w/v) formaldehyde for 15 min. To label the portion of the plasma membrane of the parasite that had not yet been shielded by the host cell plasma membrane, the samples were blocked with 1% (w/v) BSA in PBS for 40 min and incubated with rabbit anti-TgSAG1 at 1:100 dilution for 60 min. Cells were then permeabilized with 0.5% (v/v) TX-100 in PBS for 15 min, blocked with 1% (w/v) BSA in PBS for 60 min, incubated with a mixture of mouse anti-TgRON4 at 1:1,000 dilution and rat anti-TgGAP45 at 1:500 for 60 min, followed by goat anti-rabbit Alexa 488, goat anti-mouse Alexa568, and goat anti-rat Alexa647 (Life Technologies-Molecular Probes) at 1:1,000 dilution for 60 min. Parasites that formed a constriction were first identified by DIC and then recorded with fluorescence and transmitted light (DIC) imaging. Three independent experiments were performed for each line. The number of parasites analyzed for each line in each experiment was 16, 21, 15 for RH $\Delta$ hx $\Delta$ ku80 (WT); 15, 15, 15 for *mEmeraldFP-Pcr2* knock-in (KI); 12, 18, 13 for  $\Delta$ *pcr2*; and 16, 16, 12 for the complemented (Comp) parasite.

### Egress assays

For induced egress assay, parasites were added to MatTek dishes containing a confluent HFF monolayer and grown for ~35 - 40 hours. Cells were washed once and incubated in 2 ml of L15 media containing 1% heat-inactivated bovine calf serum ("L15 imaging media"), which was then replaced with ~ 2 ml of 5  $\mu$ M A23187 in L15 imaging media. Images were collected at 37°C on an Applied Precision Delta Vision imaging station equipped with an environmental chamber. To examine host cell permeabilization during parasite egress, 4',6-diamidino-2-phenylindole (DAPI) was added to L15 imaging media to a final concentration of 0.5  $\mu$ g/ml and imaged using a 60X or 100X oil objective with an exposure time of 50 ms through a BFP filter set. To examine actin kinetics in response to calcium signaling, parasites were transiently transfected with the plasmid pmin-actin-Cb-mE [58] (a kind gift from Dr. Aoife Heaslip, University of Connecticut) and imaged on the Delta Vision imaging station at 37°C before and after A23187 treatment.

### Microneme secretion assay

To examine microneme secretion, freshly egressed parasites were harvested, resuspended in 50  $\mu$ l L15 imaging media, treated for 10 min at 37 °C with 5  $\mu$ M A23187 or 50  $\mu$ M BAPTA-AM, placed on ice for 5 min, and centrifuged for 5 min at 2,000rpm (Eppendorf Centrifuge 5415D) to separate the secreted fraction (supernatant) from the parasites (pellet). The supernatant and pellet fractions were analyzed by Western blot as described in [47] with a mouse 6D10 anti-TgMIC2 antibody [76] at 1:2,000 dilution. GRA8 in the pellet was used as a loading control. The mouse anti-TgGRA8 antibody was a kind gift from Dr. Gary Ward, University of Vermont. To normalize A23187-induced MIC2 secretion, background-subtracted fluorescence of the MIC2 band from the supernatant sample was divided by background-subtracted fluorescence of the GRA8 band in the corresponding pellet sample. The amount of secretion with respect to the wild-type parasite was then calculated.

### 3-D motility assay

The 3-D motility assay for *Toxoplasma*, originally developed in [57], was carried out with the following modifications. Parasites were allowed to infect confluent cultures of HFF cells. Just prior to natural egress, extracellular parasites were removed by rinsing the monolayer with L15 imaging media. The infected monolayer was scraped with a cell scraper before passing the suspension through a 27-G needle to release any remaining intracellular parasites. The released parasites were filtered through a 3  $\mu\text{m}$  Nucleopore filter (Whatman), collected by centrifugation, resuspended in L15 imaging media and kept on ice. 7.5  $\mu\text{L}$  Matrigel (Cat#356237, thawed at 4°C overnight) was mixed with an equal volume of the parasite suspension and injected into a flow chamber assembled by sandwiching a 24x60 mm glass coverslip with a 18x18 mm glass coverslip (VWR) using two strips of 0.09 mm thick double-sided tape spaced  $\sim$  3 mm apart. The chamber was then sealed with VALAP, a mixture of vaseline, lanolin and paraffin (We found that sealing the chamber significantly reduced sample drift), placed onto the heated stage in an OMX-Flex imaging system (Applied Precision Inc.) and imaged with a heated Olympus 60X silicon lens at 37°C by DIC with the following settings: Image stacks were acquired continuously with 12 ms exposure, 1  $\mu\text{m}$  Z-section spacing, and 41 sections per stack. It takes  $\sim$  1.6 sec to complete the imaging of each stack. 301 stacks were collected for each imaging experiment.

### Electron microscopy

Extracellular parasites treated with A23187 as described in [8] were spotted onto carbon-coated copper grids and incubated at 22°C for 30 min in a humid chamber. The grids were then inverted onto 50  $\mu\text{L}$  of 0.5% (v/v) Triton X-100 in H<sub>2</sub>O on a Teflon sheet, incubated for 3 min, blotted to remove most of the liquid, inverted on a drop of H<sub>2</sub>O, blotted again, and then inverted on a drop of 2% (w/v) phosphotungstic acid (pH  $\sim$ 7) for 3 min. Grids were blotted to remove all of the liquid and allowed to dry. The negatively stained samples were imaged at a magnification of 25,000 or 29,000X on a Technai F20 (FEI) at 120 or 200 keV.

### **Acknowledgments**

We thank Drs. Dewight Williams and David Lowry of the ASU Ewring/Cowley Electron Microscopy Center for advice and support with electron microscopy, Melissa Molina and Clemente Quintero for tissue culture support. This study was supported by funding from the National Institutes of Health/National Institute of Allergy and Infectious Diseases (R01-AI132463) awarded to K.H.

### **Conflict of Interest Statement**

The authors declare that they have no conflict of interest.



## FIGURE LEGENDS

### Figure 1. Structure of the apical complex in *Toxoplasma*

**A.** *Left and middle:* Drawings depicting multiple tubulin-containing cytoskeletal structures (red) in *T. gondii*, including the 22 cortical microtubules, a pair of intra-conoid microtubules, as well as the 14 fibers that make up the conoid. IMC: Inner Membrane Complex. *Right:* Transmission electron microscopy (TEM) image of a negatively stained TritonX-100 (TX-100) extracted parasite.

**B.** TEM images of the apical parasite cytoskeleton negatively stained after detergent extraction and protease treatment. *Left:* end-on view of a parasite apical cytoskeleton. Most cortical microtubules and conoid fibers have detached, which allows a clear view of the preconoidal rings lying inside the apical polar ring. *Middle and right:* disassembled conoids with attached preconoidal rings.

### Figure 2. Identification of candidate apical complex proteins via immunoprecipitation using GFP-Trap and *eGFP-CEN2* knock-in parasites

**A.** Deconvolved wide-field images of intracellular *eGFP-CEN2* knock-in parasites [47] expressing mCherryFP tagged tubulin (red). Insets (shown at 2X) include the preconoidal region (arrowhead). PA: peripheral annuli; C: centrioles.

**B.** Table showing the average unique spectral counts, peptide counts, and sequence coverage for TGGT1\_274160, TGGT1\_257370, and TGGT1\_231840, identified by MuDPIT in 4 replicates of immunoprecipitation using GFP-Trap and *eGFP-CEN2* knock-in parasites. See Table S1 for the complete list of identified proteins.

**C.** Deconvolved wide-field images of intracellular parasites expressing mCherryFP tagged tubulin (red) and mEmeraldFP (green) tagged Pcr1 (TGGT1\_274160), Pcr2 (TGGT1\_257370), or Pcr3 (TGGT1\_231840) with expression driven by a *T. gondii* tubulin promoter. As predicted for preconoidal proteins, Pcr1, Pcr2, and Pcr3 are localized to a structure (green, insets) that is apical and smaller in diameter than the conoid (red, insets). Insets (shown at 2X) include the preconoidal region (arrowheads).

### Figure 3. Pcr2 is recruited to the preconoidal region at an early stage of daughter formation.

**A.** Projection of deconvolved wide-field images of intracellular *Pcr2-mNeonGreen 3'* endogenous tag parasites (green) labeled with a mouse anti-IMC1 antibody and a secondary goat anti-mouse Alexa350 antibody (cyan).

**B.** Projection of deconvolved wide-field images of TX-100 extracted extracellular *Pcr2-mNeonGreen 3'* endogenous tag parasites (green) labeled with rat anti-CEN2 antibody and a secondary goat anti-rat Cy3 antibody (red). Insets (shown at 2X) include the preconoidal region (arrow). Ce: centrioles. PA: peripheral annuli.

**C.** Drawing depicting a dividing parasite with daughters developing inside the mother cell. For simplification, the cortical microtubules of the mother parasite are not shown.

**D.** Montage showing projections of deconvolved wide-field images of intracellular *Pcr2-mNeonGreen 3'* endogenous tag parasites transiently expressing mAppleFP- $\beta$ 1-tubulin (TUBB1, red) from a *T. gondii* tubulin promoter. The cortical microtubules in the mother parasites are present and clearly seen in the single slices of the 3-D stack, but not clearly visible in these projections due to the decreased contrast in the maximum intensity projection for weaker signals. *Pcr2* (green) is recruited to the newly formed apical cytoskeleton as soon as the daughters are detectable. Top row: interphase parasites. Row 2-4: parasites with daughters from early to mid-stage of assembly. Insets (shown at 2X) include the apical region of one of the daughter parasites indicated by arrows. Ce: centrioles. Arrowhead: a *Pcr2-mNeonGreen* concentration is occasionally seen in the basal region of these parasites.

**Figure 4.** Generation of *mEmeraldFP-Pcr2* knock-in and  $\Delta pcr2$  parasites and assessment of their plaquing efficiency

**A. Left**, schematic for generating *mEmeraldFP-Pcr2* knock-in,  $\Delta pcr2$  parasites, and the *Pcr2-mNeonGreen 3'* endogenous tagged line, and Southern blotting strategy. RH $\Delta hx\Delta ku80$  parasites (WT) were used to generate *mEmeraldFP-Pcr2* knock-in parasites via double-crossover homologous recombination. The knock-in parasites were then transiently transfected with a plasmid expressing Cre recombinase to excise the fragment between the two LoxP sites. The *Pcr2-mNeonGreen 3'* endogenous tagged line was generated via single-crossover homologous recombination. The positions of the restriction sites, CDS probe (purple bar) and the probe annealing downstream of the *pcr2* coding sequence ("3' UTR probe", orange bar) used in Southern blotting analysis and the corresponding DNA fragment sizes expected are shown. **Right**, Southern blotting analysis of the *pcr2* locus in RH $\Delta hx\Delta ku80$  (WT), *mEmeraldFP-Pcr2* knock-in (KI),  $\Delta pcr2$  (KO), complemented (Comp) parasites and the *Pcr2-mNeonGreen 3'* tagged line ("3'tag"). For hybridization with the CDS probe, parasite genomic DNA was digested with *RsrII*. The predicted *RsrII* fragment size is 5270 bp for the parental (*i.e.*, wild-type *pcr2* locus), 2946 bp for the knock-in, and ~ 9.1kb for the *Pcr2-mNeonGreen 3'* tagged line. As expected, no signal was detected in the lane with  $\Delta pcr2$  genomic DNA when hybridized with the CDS probe. For hybridization with the 3'UTR probe, parasite genomic DNA was digested with *NcoI*. The predicted *NcoI* fragment size is 8197 bp for the parental, 8665 bp for the knock-in, 2151 bp for the knockout, and ~ 10.9 kb for the *Pcr2-mNeonGreen 3'* tagged line. The box representing the pLIC tagging plasmid is not drawn to scale. Two sets (a and b) of independently generated knock-in, knockout, and complemented lines were analyzed. Complemented parasite lines were generated by reintroducing the knock-in plasmid into the knockout clones. The Southern blot band pattern suggests that the plasmid was integrated into different locations of the genome in the two complemented lines, one of which (a) was the *pcr2* locus.

**B.** EM examination of the apical complex in the RH $\Delta hx\Delta ku80$  parental (WT, left column) and  $\Delta pcr2$  (right column) parasites that had been incubated with the calcium ionophore A23187 (which induces conoid extension), followed by TX-100 treatment.

**C.** Plaques formed by RH $\Delta hx\Delta ku80$  (WT), *mEmeraldFP-Pcr2* knock-in (KI),  $\Delta pcr2$  (KO), and complemented (Complement) parasite lines. Plaque assays for two independent sets of knock-in, knockout and complemented lines are shown. Nine days after inoculation, the cultures were fixed with 70% ethanol and then stained with crystal violet. "plaques" are cleared spaces where the HFF monolayers were destroyed by recurring cycles of parasite invasion, replication and egress.

**Figure 5.** Parasite replication is not affected, but egress is impaired in  $\Delta pcr2$  parasites.

**A.** The average number of replications at 12, 24 or 36 hrs after infection in four independent experiments for RH $\Delta hx\Delta ku80$  (WT), *mEmeraldFP-Pcr2* knock-in (*mE-Pcr2 KI*), knockout ( $\Delta pcr2$ ), and complemented (Comp) parasites. Error bars: standard error

**B.** Dot plots of time taken to disperse after treated with 5  $\mu$ M A23187 for intracellular RH $\Delta hx\Delta ku80$  (WT), *mEmeraldFP-Pcr2* knock-in (*mE-Pcr2 KI*), knockout ( $\Delta pcr2$ ), and complemented parasites. N: total number of vacuoles analyzed in 4 experiments, in which the parasite egress was monitored by time-lapse microscopy with 10-second intervals. \*:  $\Delta pcr2$  parasites in 37 out of 49 vacuoles failed to disperse from the parasitophorous vacuole during the 600 sec observation period.

**C.** Images selected from time-lapse experiments of intracellular WT, *mE-Pcr2 KI*,  $\Delta pcr2$ , and complemented parasites treated with 5  $\mu$ M A23187 (also see Video S1). A23187 was added



immediately before the beginning of the time-lapse. Red arrows indicate the positions of the parasitophorous vacuole in each image. Blue arrows indicate some of the egressed parasites that have invaded into a new host cell (see Video S1).

**Figure 6.** Calcium ionophore-induced micronemal secretion is not significantly affected in  $\Delta pcr2$  parasites.

**A.** Images selected from time-lapse experiments of intracellular RH $\Delta hx\Delta ku80$  (WT), *mEmeraldFP-Pcr2* knock-in (*mE-Pcr2 KI*), and knockout ( $\Delta pcr2$ ) treated with 5  $\mu$ M A23187 (also see Video S2). The cell impermeant DNA-binding dye, DAPI, was added to the medium to monitor the permeabilization of the host cell.  $\Delta pcr2$  parasites are able to secrete effectors that lyse the host cell upon A23187 treatment, indicated by DAPI entering the host cell nucleus and binding to DNA, as well as by the dramatic change in the morphology of the host cell (see Videos S1-S2). Insets are DAPI images of the nuclear region of the host cell shown at 0.5X. Brackets in the *mE-Pcr2 KI* panels indicate the host cell nucleus included in the insets. Contrast was adjusted so that the DAPI labeling at the rim of the nucleus is easily visible. Uninfected fibroblasts remained unlabeled by DAPI ~19 min after A23187 treatment as shown in the larger field of view images in the right-hand column.

**B.** Projections of deconvolved wide-field fluorescence images of intracellular WT, *mE-Pcr2 KI*,  $\Delta pcr2$ , and complemented (Comp) parasites labeled with a mouse anti-MIC2 (red), a rat anti-GAP45 (cyan) and corresponding secondary antibodies.

**C.** Western blots of the secreted (supernatant, S) and unsecreted (pellet, P) fractions of WT, *mE-Pcr2 KI*,  $\Delta pcr2$ , and complemented (Comp) parasites after A23187 or BAPTA-AM (a calcium chelator; negative control) treatment. The blots were probed by antibodies against MIC2 and GRA8. GRA8 in the pellet was used as the loading control. M: molecular weight markers, the masses of which are indicated in kDa by the numbers on the left.

**D.** Levels of MIC2 in the secreted fractions relative to that from the wild-type in 3 independent biological replicates. For each sample, the integrated MIC2 signal was normalized to the GRA8 signal in the corresponding pellet. Error bars: standard error.

**Figure 7.** The  $\Delta pcr2$  parasite moves spasmodically in Matrigel.

**A.** Four examples of wild-type parasites that displayed constriction during movement in 50% Matrigel. Also see Video S3.

**B.** Table showing percentage of motile RH $\Delta hx\Delta ku80$  (WT), *mE-Pcr2* Knock-in (KI),  $\Delta pcr2$ , complemented (Comp), and  $\Delta akmt$  parasites in the 3-D motility assay.

**C.** Movement tracks for WT,  $\Delta pcr2$ , complemented (Comp), and  $\Delta akmt$  parasites generated by projections of 3-D motility timelapses. See Videos S4 - S5. To make these 2-D images of parasites travel through the 3-D gel, a projection of the 3-D stack at each time point was first generated by Stack fuser (ImageJ/Fiji), then 150 consecutive timeframes in the projected sequence were compressed into a single frame. Six traces each for WT,  $\Delta pcr2$ , and complemented parasites are highlighted by traces drawn by hand. Pauses in the parasite movement that lasted for 7 frames (~ 11 sec) or longer in these traces are indicated with arrows of the same color.

**Figure 8.** Pcr2 functions differently from another motility regulator, AKMT, and Pcr2 knockout does not block actomyosin activity.

**A.** Images selected from time-lapse experiments of intracellular  $\Delta akmt$  and  $\Delta pcr2$  parasites treated with 5  $\mu$ M A23187. Note that  $\Delta akmt$  parasites, which are largely immobile, maintained their organization within the vacuole after lysis of the host cell. However the position and orientation of the  $\Delta pcr2$  parasites shifted during the time lapse due to sporadic, unproductive,

parasite movement (see Video S6).

**B.** Actin-chromobody-mEmerald (actin-Cb-mE) distribution before and after A23187 treatment in the *RHΔhxΔku80* parental (*WT*), *Δakmt* and *Δpcr2* parasites. The grayscale actin-Cb-mE fluorescence images are projections of the image stack at the corresponding time point.

**C.** Localization of AKMT in the *RHΔhxΔku80* parental (*WT*) and *Δpcr2* parasites before and after ~ 5 min 5 μM A23187 treatment. Before exposure to A23187, AKMT is concentrated at the apical end (arrows) of intracellular *WT* and *Δpcr2* parasites. The increase in intra-parasite [Ca<sup>2+</sup>] caused by A23187 treatment triggers the dispersal of AKMT from the parasite apical end in both the parental and the *Δpcr2* parasites. AKMT was labeled by immunofluorescence using a rat anti-AKMT antibody and a secondary goat anti-rat Cy3 antibody. The grayscale anti-AKMT fluorescence images are projections of deconvolved image stacks.

**Figure 9.** The *Δpcr2* parasite moves fitfully during invasion.

Images selected from time-lapse recording of *RHΔhxΔku80* (*WT*, **A**), *mEmeraldFP-Pcr2* knock-in (*KI*, **B**), knockout (*Δpcr2*, **C-E**), and complemented (*Comp*, **F**) parasites in the process of invasion or attempted invasion. D and E show two examples of abortive invasion by the *Δpcr2* parasite. Arrows: constrictions formed during invasion. Also see Video S7.

**Figure 10.** *Δpcr2* parasites are defective in assembling the moving junction.

**A.** Projections of deconvolved wide-field fluorescence images of intracellular *mE-Pcr2* *KI* (*KI*) and *Δpcr2* parasites labeled with a mouse anti-RON4 (red), a rat anti-GAP45 (cyan) and corresponding secondary antibodies.

**B.** Outline of a pulse invasion assay to analyze the assembly of the moving junction (marked by anti-RON4 labeling), and the differential accessibility of the intracellular vs extracellular portion of the invading parasites to antibody labeling of the SAG1 surface antigen.

**C.** DIC and projections of deconvolved wide-field fluorescence images of *RHΔhxΔku80* (*WT*), *mEmeraldFP-Pcr2* knock-in (*KI*), knockout (*Δpcr2*) and complemented (*Comp*) parasites, in which SAG1 (green) RON4 (red), and GAP45 (cyan) were labeled by immunofluorescence in the pulse invasion assay described in B. Two predominant patterns are included.

**D.** Quantification of all four SAG1 and RON4 labeling patterns observed in *WT*, *KI*, *Δpcr2* and complemented (*Comp*) parasites from three independent biological replicates. Error bars: standard error. \* P value <0.05 (unpaired Student's t-tests), when compared with *WT* parasites.

**Table 1.** Quantification of invasion (mean number of intracellular parasites ± standard error) by the four *T. gondii* strains. The number of intracellular parasites per field was counted in ten fields per strain, in each of three independent biological replicates. P-values from unpaired Student's t-tests are indicated on the right.

| Strain                          | Number invaded ± SE | % WT | <i>RHΔhxΔku80</i> (WT) | <i>mEmeraldFP-Pcr2</i> knock-in | <i>Δpcr2</i> | complement   |
|---------------------------------|---------------------|------|------------------------|---------------------------------|--------------|--------------|
| <i>RHΔhxΔku80</i> (WT)          | 45.4±6.0            | 100  |                        | 0.78                            | <b>0.049</b> | 0.33         |
| <i>mEmeraldFP-Pcr2</i> knock-in | 43.1±5.0            | 96   |                        |                                 | <b>0.038</b> | 0.18         |
| <i>Δpcr2</i>                    | 23±2.5              | 51   |                        |                                 |              | <b>0.005</b> |
| complement                      | 53.6±3.9            | 120  |                        |                                 |              |              |

## Supplemental Videos:

**Video S1:** Time-lapse microscopy of A23187 induced-egress for wild-type (*WT*), *mEmeraldFP-Pcr2* knock-in (*mE-Pcr2 KI*),  $\Delta pcr2$ , and complemented parasites. A23187 was added at the beginning of the movies to a final concentration of 5  $\mu$ M. Time interval: 1 sec. Video speed: 60 frames/s. Scale bar: 5  $\mu$ m.

**Video S2:** Time-lapse microscopy of A23187 induced-egress for wild-type (*WT*), *mEmeraldFP-Pcr2* knock-in (*mE-Pcr2 KI*), and  $\Delta pcr2$  parasites. A cell impermeant DNA binding dye (DAPI) was present in the culture medium. The permeabilization of the host cell by the parasites can be detected by the DAPI entering the host cell nucleus to label the DNA. Time interval: 5 sec. Video speed: 12 frames/s. Scale bar: 5  $\mu$ m.

**Video S3:** Time-lapse microscopy of four examples of wild-type parasites moving in 50% Matrigel. The formation of constrictions can be observed during the parasite movement. For each time point, the projection of the 3-D stack was generated by Stack focuser (ImageJ/Fiji). Time interval: 1.6 sec. Video speed: 4 frames/s. Scale bar: 5  $\mu$ m

**Video S4:** Time-lapse microscopy of 3-D motility in 50% Matrigel for wild-type (*WT*),  $\Delta pcr2$ , and complemented parasites. For each time point, the projection of the 3-D stack was generated by Stack focuser (ImageJ/Fiji). Time interval:  $\sim$  1.6 sec. Video speed: 10 frames/s. Scale bar: 10  $\mu$ m. See Video S5 for a dynamic display of the tracks of the parasite movement.

**Video S5:** Videos that display tracks of the movement of wild-type (*WT*),  $\Delta pcr2$ , and complemented parasites included in Video S4. The movies were generated using the "Trail movie" function in Softworx (Applied Precision, Inc.). Time interval:  $\sim$  1.6 sec. Video speed: 10 frames/s.

**Video S6:** Time-lapse microscopy of A23187-induced egress for  $\Delta pcr2$  and  $\Delta akmt$  parasites. Time interval: 1 sec. Video speed: 60 frames/s. Scale bar: 5  $\mu$ m.

**Video S7:** Time-lapse microscopy of invasions or invasion attempts for wild-type (*WT*), *mEmeraldFP-Pcr2* knock-in (*KI*),  $\Delta pcr2$  (*pcr2KO*), and complemented (*Comp*) parasites. Figure 9 includes images selected from the timelapses in the leftmost column, as well as those from the 2nd and 3rd  $\Delta pcr2$  timelapses. Time interval: 1 sec. Video speed: 6 frames/s. Scale bar: 5  $\mu$ m.

**Supplemental Figure S1.** Pcr2 sequence and AlphaFold prediction of Pcr2 structure. Residues predicted to form alpha-helices ( $pLDDT > 70$ ) are highlighted in green.

**Supplemental Table S1.** List of proteins identified in MudPIT analysis of immunoprecipitation using GFP-Trap and lysate from a *eGFP-CEN2* knock-in parasite line [47].

**Supplemental Table S2.** List of primers used in this study.

## References

1. Hopp, C.S., K. Chiou, D.R.T. Ragheb, A.M. Salman, S.M. Khan, A.J. Liu, and P. Sinnis, *Longitudinal analysis of Plasmodium sporozoite motility in the dermis reveals component of blood vessel recognition*. eLife, 2015. 4: p. e07789.
2. Sibley, L. and J. Heuser. *Host cell invasion and gliding motility by Toxoplasma gondii*. in *Society of Protozoologists Meeting*. 1994. Cleveland.
3. Hoff, E.F. and V.B. Carruthers, *Is Toxoplasma egress the first step in invasion?* Trends Parasitol, 2002. 18(6): p. 251-5.
4. Sibley, L.D., *Invasion of vertebrate cells by Toxoplasma gondii*. Trends Cell Biol, 1995. 5(3): p. 129-32.
5. Sibley, L.D., *Toxoplasma gondii: perfecting an intracellular life style*. Traffic, 2003. 4(9): p. 581-6.
6. Soldati, D. and M. Meissner, *Toxoplasma as a novel system for motility*. Current opinion in cell biology, 2004. 16(1): p. 32-40.
7. Heaslip, A.T., M. Nishi, B. Stein, and K. Hu, *The motility of a human parasite, Toxoplasma gondii, is regulated by a novel lysine methyltransferase*. PLoS Pathog, 2011. 7(9): p. e1002201.
8. Nagayasu, E., Y.-c. Hwang, J. Liu, J. Murray, and K. Hu, *Loss of a doublecortin (DCX) domain containing protein causes structural defects in a tubulin-based organelle of Toxoplasma gondii and impairs host cell invasion*. Molecular Biology of the Cell, 2016. E16-08-0587
9. Long, S., K.M. Brown, L.L. Drewry, B. Anthony, I.Q.H. Phan, and L.D. Sibley, *Calmodulin-like proteins localized to the conoid regulate motility and cell invasion by Toxoplasma gondii*. PLoS Pathog, 2017. 13(5): p. e1006379.
10. Long, S., B. Anthony, L.L. Drewry, and L.D. Sibley, *A conserved ankyrin repeat-containing protein regulates conoid stability, motility and cell invasion in Toxoplasma gondii*. Nat Commun, 2017. 8(1): p. 2236.
11. Leung, J.M., E. Nagayasu, Y.-C. Hwang, J. Liu, P.G. Pierce, I.Q. Phan, R.A. Prentice, J.M. Murray, and K. Hu, *A doublecortin-domain protein of Toxoplasma and its orthologues bind to and modify the structure and organization of tubulin polymers*. BMC Molecular and Cell Biology, 2020. 21(1): p. 8.
12. Graindorge, A., K. Frenal, D. Jacot, J. Salamun, J.B. Marq, and D. Soldati-Favre, *The Conoid Associated Motor MyoH Is Indispensable for Toxoplasma gondii Entry and Exit from Host Cells*. PLoS Pathogens, 2016. 12(1): p. e1005388.
13. Tosetti, N., N. Dos Santos Pacheco, D. Soldati-Favre, and D. Jacot, *Three F-actin assembly centers regulate organelle inheritance, cell-cell communication and motility in Toxoplasma gondii*. eLife, 2019. 8: p. e42669.
14. Joiner, K., *Cell attachment and entry by Toxoplasma gondii*. Behring Inst. Mitt., 1991. 88: p. 20-26.
15. Werk, R., *How does Toxoplasma gondii enter host cells?* Rev. Infect. Dis., 1985. 7(44): p. 449-457.
16. Bonhomme, A., L. Pingret, and J.M. Pinon, *Review: Toxoplasma gondii cellular invasion*. Parassitologia, 1992. 34(1-3): p. 31-43.
17. Suss-Toby, E., J. Zimmerberg, and G.E. Ward, *Toxoplasma invasion: the parasitophorous vacuole is formed from host cell plasma membrane and pinches off via a fission pore*. Proceedings of the National Academy of Sciences of the United States of America, 1996. 93(16): p. 8413-8.
18. Carruthers, V.B., *Host cell invasion by the opportunistic pathogen Toxoplasma gondii*. Acta Trop, 2002. 81(2): p. 111-22.



19. Dubremetz, J.F., *Host cell invasion by Toxoplasma gondii*. Trends Microbiol, 1998. 6(1): p. 27-30.
20. Mordue, D.G., N. Desai, M. Dustin, and L.D. Sibley, *Invasion by Toxoplasma gondii establishes a moving junction that selectively excludes host cell plasma membrane proteins on the basis of their membrane anchoring*. J Exp Med, 1999. 190(12): p. 1783-92.
21. Sasono, P.M. and J.E. Smith, *Toxoplasma gondii: an ultrastructural study of host-cell invasion by the bradyzoite stage*. Parasitol Res, 1998. 84(8): p. 640-5.
22. Sibley, L.D., *Interactions between Toxoplasma gondii and its mammalian host cells*. Semin Cell Biol, 1993. 4(5): p. 335-44.
23. Charron, A.J. and L.D. Sibley, *Molecular partitioning during host cell penetration by Toxoplasma gondii*. Traffic, 2004. 5(11): p. 855-67.
24. Ward, G., L. Miller, and J. Dvorak, *The origin of the parasitophorous vacuole membrane lipids in malaria-infected erythrocytes*. J. Cell Sci., 1993. 106: p. 237-48.
25. Ward, G., C. Chitnis, and L. Miller, *The invasion of erythrocytes by malarial merozoites*, in *Bailliere's Clinical Infectious Diseases*, D. Russell, Editor. 1994, Bailliere Tindall: London.
26. Schwab, J.C., C.J. Beckers, and K.A. Joiner, *The parasitophorous vacuole membrane surrounding intracellular Toxoplasma gondii functions as a molecular sieve*. Proc Natl Acad Sci U S A, 1994. 91(2): p. 509-13.
27. Lingelbach, K. and K.A. Joiner, *The parasitophorous vacuole membrane surrounding Plasmodium and Toxoplasma: an unusual compartment in infected cells*. J. Cell Sci., 1998. 111(Pt 11): p. 1467-75.
28. Borges-Pereira, L., A. Budu, C.A. McKnight, C.A. Moore, S.A. Vella, M.A. Hortua Triana, J. Liu, C.R. Garcia, D.A. Pace, and S.N. Moreno, *Calcium Signaling throughout the Toxoplasma gondii Lytic Cycle: A STUDY USING GENETICALLY ENCODED CALCIUM INDICATORS*. J Biol Chem, 2015. 290(45): p. 26914-26.
29. Blader, I.J., B.I. Coleman, C.-T. Chen, and M.-J. Gubbels, *Lytic Cycle of Toxoplasma gondii: 15 Years Later*. Annual review of microbiology, 2015. 69: p. 463-485.
30. Kafsack, B.F.C., J.D.O. Pena, I. Coppens, S. Ravindran, J.C. Boothroyd, and V.B. Carruthers, *Rapid membrane disruption by a perforin-like protein facilitates parasite exit from host cells*. Science, 2009. 323(5913): p. 530-3.
31. Jacot, D., N. Tosetti, I. Pires, J. Stock, A. Graindorge, Y.F. Hung, H. Han, R. Tewari, I. Kursula, and D. Soldati-Favre, *An Apicomplexan Actin-Binding Protein Serves as a Connector and Lipid Sensor to Coordinate Motility and Invasion*. Cell Host & Microbe, 2016. 20(6): p. 731-743.
32. Dobrowolski, J.M., V.B. Carruthers, and L.D. Sibley, *Participation of myosin in gliding motility and host cell invasion by Toxoplasma gondii*. Mol Microbiol, 1997. 26(1): p. 163-73.
33. Beckers, C.J. *Toxoplasma gondii motility: Regulatory mechanisms and the identification of a Myosin-A containing protein complex in the plasma membrane*. in *2001 Molecular Parasitology meeting*. 2001. Woods hole, MA.
34. Meissner, M., D. Schluter, and D. Soldati, *Role of Toxoplasma gondii myosin A in powering parasite gliding and host cell invasion*. Science, 2002. 298(5594): p. 837-40.

35. Gaskins, E., S. Gilk, N. DeVore, T. Mann, G. Ward, and C. Beckers, *Identification of the membrane receptor of a class XIV myosin in Toxoplasma gondii*. *J Cell Biol*, 2004. 165(3): p. 383-93.
36. Huynh, M.-H. and V.B. Carruthers, *Toxoplasma MIC2 is a major determinant of invasion and virulence*. *PLoS Pathogens*, 2006. 2(8): p. e84.
37. Huynh, M.H., K.E. Rabenau, J.M. Harper, W.L. Beatty, L.D. Sibley, and V.B. Carruthers, *Rapid invasion of host cells by Toxoplasma requires secretion of the MIC2-M2AP adhesive protein complex*. *Embo J*, 2003. 22(9): p. 2082-90.
38. Frenal, K., V. Polonais, J.B. Marq, R. Stratmann, J. Limenitakis, and D. Soldati-Favre, *Functional dissection of the apicomplexan glideosome molecular architecture*. *Cell Host Microbe*, 2010. 8(4): p. 343-57.
39. Opitz, C. and D. Soldati, *'The glideosome': a dynamic complex powering gliding motion and host cell invasion by Toxoplasma gondii*. *Mol Microbiol*, 2002. 45(3): p. 597-604.
40. Del Rosario, M., J. Periz, G. Pavlou, O. Lyth, F. Latorre-Barragan, S. Das, G.S. Pall, J.F. Stortz, L. Lemgruber, J.A. Whitelaw, J. Baum, I. Tardieux, and M. Meissner, *Apicomplexan F-actin is required for efficient nuclear entry during host cell invasion*. *EMBO reports*, 2019. 20(12): p. e48896.
41. Nichols, B.A. and M.L. Chiappino, *Cytoskeleton of Toxoplasma gondii*. *J. Protozool.*, 1987. 34(2): p. 217-26.
42. Morrissette, N.S., J.M. Murray, and D.S. Roos, *Subpellicular microtubules associate with an intramembranous particle lattice in the protozoan parasite Toxoplasma gondii*. *J. Cell Sci.*, 1997. 110(Pt 1): p. 35-42.
43. Morrissette, N.S. and L.D. Sibley, *Cytoskeleton of apicomplexan parasites*. *Microbiol Mol Biol Rev*, 2002. 66(1): p. 21-38.
44. Hu, K., D.S. Roos, and J.M. Murray, *A novel polymer of tubulin forms the conoid of Toxoplasma gondii*. *J Cell Biol*, 2002. 156(6): p. 1039-50.
45. Hu, K., J. Johnson, L. Florens, M. Fraunholz, S. Suravajjala, C. DiLullo, J. Yates, D.S. Roos, and J.M. Murray, *Cytoskeletal components of an invasion machine – the apical complex of Toxoplasma gondii*. *PloS pathogens*, 2006. 2(2): p. 0121-0139.
46. Hu, K., *Organizational Changes of the Daughter Basal Complex during the Parasite Replication of Toxoplasma gondii*. *PLoS Pathogens*, 2008. 4((1)): p. 108-121.
47. Leung, J.M., J. Liu, L.A. Wetzel, and K. Hu, *Centrin2 from the human parasite Toxoplasma gondii is required for its invasion and intracellular replication*. *J Cell Sci*, 2019.
48. Koreny, L., M. Zeeshan, K. Barylyuk, E.C. Tromer, J.J.E. van Hooff, D. Brady, H. Ke, S. Chelaghma, D.J.P. Ferguson, L. Eme, R. Tewari, and R.F. Waller, *Molecular characterization of the conoid complex in Toxoplasma reveals its conservation in all apicomplexans, including Plasmodium species*. *PLoS biology*, 2021. 19(3): p. e3001081.
49. Sidik, S.M., C.G. Hackett, F. Tran, N.J. Westwood, and S. Lourido, *Efficient genome engineering of Toxoplasma gondii using CRISPR/Cas9*. *PLoS One*, 2014. 9(6): p. e100450.
50. Jumper, J., R. Evans, A. Pritzel, T. Green, M. Figurnov, O. Ronneberger, K. Tunyasuvunakool, R. Bates, A. Žídek, A. Potapenko, A. Bridgland, C. Meyer, S.A.A. Kohl, A.J. Ballard, A. Cowie, B. Romera-Paredes, S. Nikolov, R. Jain, J. Adler, T. Back, S. Petersen, D. Reiman, E. Clancy, M. Zielinski, M. Steinegger, M.

- Pacholska, T. Berghammer, S. Bodenstern, D. Silver, O. Vinyals, A.W. Senior, K. Kavukcuoglu, P. Kohli, and D. Hassabis, *Highly accurate protein structure prediction with AlphaFold*. *Nature*, 2021. 596(7873): p. 583-589.
51. Liu, J., Y. He, I. Benmerzouga, W.J. Sullivan, Jr., N.S. Morrissette, J.M. Murray, and K. Hu, *An ensemble of specifically targeted proteins stabilizes cortical microtubules in the human parasite Toxoplasma gondii*. *Molecular Biology of the Cell (Featured as Journal Cover)*, 2015. 27(3): p. 549-71.
52. Heaslip, A.T., F. Dzierszynski, B. Stein, and K. Hu, *TgMORN1 is a key organizer for the basal complex of Toxoplasma gondii*. *PLoS Pathogens*, 2010. 6(2): p. e1000754.
53. Liu, J., L. Wetzel, Y. Zhang, E. Nagayasu, S. Ems-McClung, L. Florens, and K. Hu, *Novel Thioredoxin-Like Proteins Are Components of a Protein Complex Coating the Cortical Microtubules of Toxoplasma gondii*. *Eukaryotic cell*, 2013. 12(12): p. 1588-99.
54. Carey, K.L., N.J. Westwood, T.J. Mitchison, and G.E. Ward, *A small-molecule approach to studying invasive mechanisms of Toxoplasma gondii*. *Proc Natl Acad Sci U S A*, 2004. 101(19): p. 7433-8.
55. Mital, J., M. Meissner, D. Soldati, and G.E. Ward, *Conditional expression of Toxoplasma gondii apical membrane antigen-1 (TgAMA1) demonstrates that TgAMA1 plays a critical role in host cell invasion*. *Molecular Biology of the Cell*, 2005. 16(9): p. 4341-9.
56. Gras, S., A. Jackson, S. Woods, G. Pall, J. Whitelaw, J.M. Leung, G.E. Ward, C.W. Roberts, and M. Meissner, *Parasites lacking the micronemal protein MIC2 are deficient in surface attachment and host cell egress, but remain virulent in vivo*. *Wellcome Open Res*, 2017. 2: p. 32.
57. Leung, J.M., M.A. Rould, C. Konradt, C.A. Hunter, and G.E. Ward, *Disruption of TgPHIL1 alters specific parameters of Toxoplasma gondii motility measured in a quantitative, three-dimensional live motility assay*. *PloS one*, 2014. 9(1): p. e85763.
58. Periz, J., J. Whitelaw, C. Harding, S. Gras, M.I. Del Rosario Minina, F. Latorre-Barragan, L. Lemgruber, M.A. Reimer, R. Insall, A. Heaslip, and M. Meissner, *Toxoplasma gondii F-actin forms an extensive filamentous network required for material exchange and parasite maturation*. *eLife*, 2017. 6: p. e24119.
59. Periz, J., M. Del Rosario, A. McStea, S. Gras, C. Loney, L. Wang, M.L. Martin-Fernandez, and M. Meissner, *A highly dynamic F-actin network regulates transport and recycling of micronemes in Toxoplasma gondii vacuoles*. *Nature Communications*, 2019. 10(1): p. 4183.
60. Stadler, R.V., L.A. White, K. Hu, B.P. Helmke, and W.H. Guilford, *Direct measurement of cortical force generation and polarization in a living parasite*. *Mol Biol Cell*, 2017. E16-07-0518.
61. Besteiro, S., A. Michelin, J. Poncet, J.F. Dubremetz, and M. Lebrun, *Export of a Toxoplasma gondii rhoptry neck protein complex at the host cell membrane to form the moving junction during invasion*. *PLoS Pathog*, 2009. 5(2): p. e1000309.
62. Lebrun, M., A. Michelin, H. El Hajj, J. Poncet, P.J. Bradley, H. Vial, and J.F. Dubremetz, *The rhoptry neck protein RON4 re-localizes at the moving junction during Toxoplasma gondii invasion*. *Cell Microbiol*, 2005. 7(12): p. 1823-33.
63. Alexander, D.L., J. Mital, G.E. Ward, P. Bradley, and J.C. Boothroyd, *Identification of the moving junction complex of Toxoplasma gondii: a collaboration between distinct secretory organelles*. *PLoS Pathogens*, 2005. 1(2): p. e17.



64. Beck, J.R., A.L. Chen, E.W. Kim, and P.J. Bradley, *RON5 is critical for organization and function of the Toxoplasma moving junction complex*. PLoS pathogens, 2014. 10(3): p. e1004025.
65. Cao, J., O. Kaneko, A. Thongkukiattkul, M. Tachibana, H. Otsuki, Q. Gao, T. Tsuboi, and M. Torii, *Rhoptry neck protein RON2 forms a complex with microneme protein AMA1 in Plasmodium falciparum merozoites*. Parasitol Int, 2009. 58(1): p. 29-35.
66. Lamarque, M., S. Besteiro, J. Papoin, M. Roques, B. Vulliez-Le Normand, J. Morlon-Guyot, J.F. Dubremetz, S. Fauquenoy, S. Tomavo, B.W. Faber, C.H. Kocken, A.W. Thomas, M.J. Boulanger, G.A. Bentley, and M. Lebrun, *The RON2-AMA1 interaction is a critical step in moving junction-dependent invasion by apicomplexan parasites*. PLoS Pathog, 2011. 7(2): p. e1001276.
67. Lamarque, M.H., M. Roques, M. Kong-Hap, M.L. Tonkin, G. Rugarabamu, J.-B. Marq, D.M. Penarete-Vargas, M.J. Boulanger, D. Soldati-Favre, and M. Lebrun, *Plasticity and redundancy among AMA-RON pairs ensure host cell entry of Toxoplasma parasites*. Nature communications, 2014. 5: p. 4098.
68. Leung, J.M., Y. He, F. Zhang, Y.C. Hwang, E. Nagayasu, J. Liu, J.M. Murray, and K. Hu, *Stability and function of a putative microtubule organizing center in the human parasite Toxoplasma gondii*. Molecular Biology of the Cell (Featured as Journal Cover), 2017. 28(10): p. 1361-1378.
69. Roos, D.S., R.G. Donald, N.S. Morrissette, and A.L. Moulton, *Molecular tools for genetic dissection of the protozoan parasite Toxoplasma gondii*. Methods Cell Biol., 1994. 45: p. 27-78.
70. Xu, T., S.K. Park, J.D. Venable, J.A. Wohlschlegel, J.K. Diedrich, D. Cociorva, B. Lu, L. Liao, J. Hewel, X. Han, C.C.L. Wong, B. Fonslow, C. Delahunty, Y. Gao, H. Shah, and J.R. Yates, *ProLuCID: An improved SEQUEST-like algorithm with enhanced sensitivity and specificity*. Journal of Proteomics, 2015. 129: p. 16-24.
71. Tabb, D.L., W.H. McDonald, and J.R. Yates, 3rd, *DTASelect and Contrast: tools for assembling and comparing protein identifications from shotgun proteomics*. J Proteome Res, 2002. 1(1): p. 21-6.
72. Zhang, Y., Z. Wen, M.P. Washburn, and L. Florens, *Refinements to Label Free Proteome Quantitation: How to Deal with Peptides Shared by Multiple Proteins*. Analytical Chemistry, 2010. 82(6): p. 2272-2281.
73. Fox, B.A., J.G. Ristuccia, J.P. Gigley, and D.J. Bzik, *Efficient gene replacements in Toxoplasma gondii strains deficient for nonhomologous end joining*. Eukaryotic Cell, 2009. 8(4): p. 520-9.
74. Huynh, M.H. and V.B. Carruthers, *Tagging of endogenous genes in a Toxoplasma gondii strain lacking Ku80*. Eukaryotic Cell, 2009. 8(4): p. 530-9.
75. Shaner, N.C., G.G. Lambert, A. Chammas, Y. Ni, P.J. Cranfill, M.A. Baird, B.R. Sell, J.R. Allen, R.N. Day, M. Israelsson, M.W. Davidson, and J. Wang, *A bright monomeric green fluorescent protein derived from Branchiostoma lanceolatum*. Nat Methods, 2013. 10(5): p. 407-9.
76. Carruthers, V.B., G.D. Sherman, and L.D. Sibley, *The Toxoplasma adhesive protein MIC2 is proteolytically processed at multiple sites by two parasite-derived proteases*. J Biol Chem, 2000. 275(19): p. 14346-53.
77. Fichera, M.E., M.K. Bhopale, and D.S. Roos, *In vitro assays elucidate peculiar kinetics of clindamycin action against Toxoplasma gondii*. Antimicrobial Agents & Chemotherapy, 1995. 39(7): p. 1530-7.

# Figure 1

A

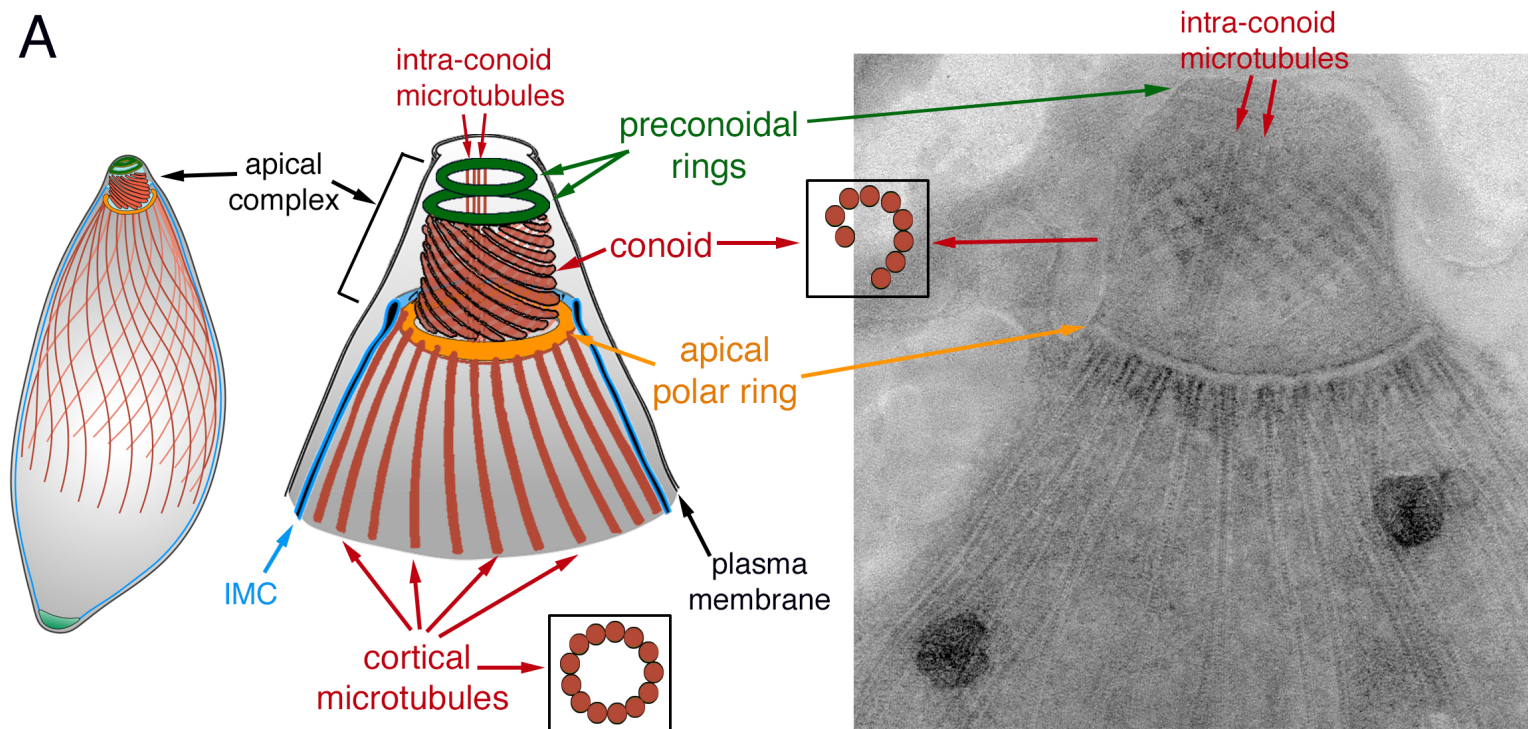

B

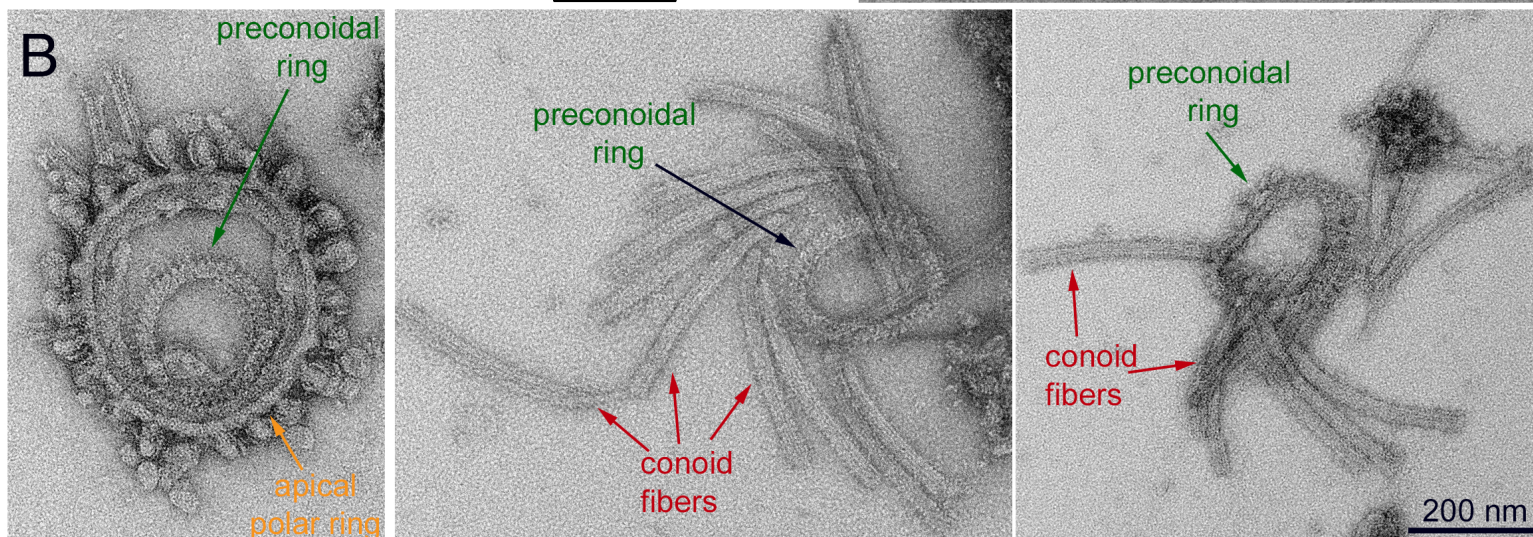



# Figure 2

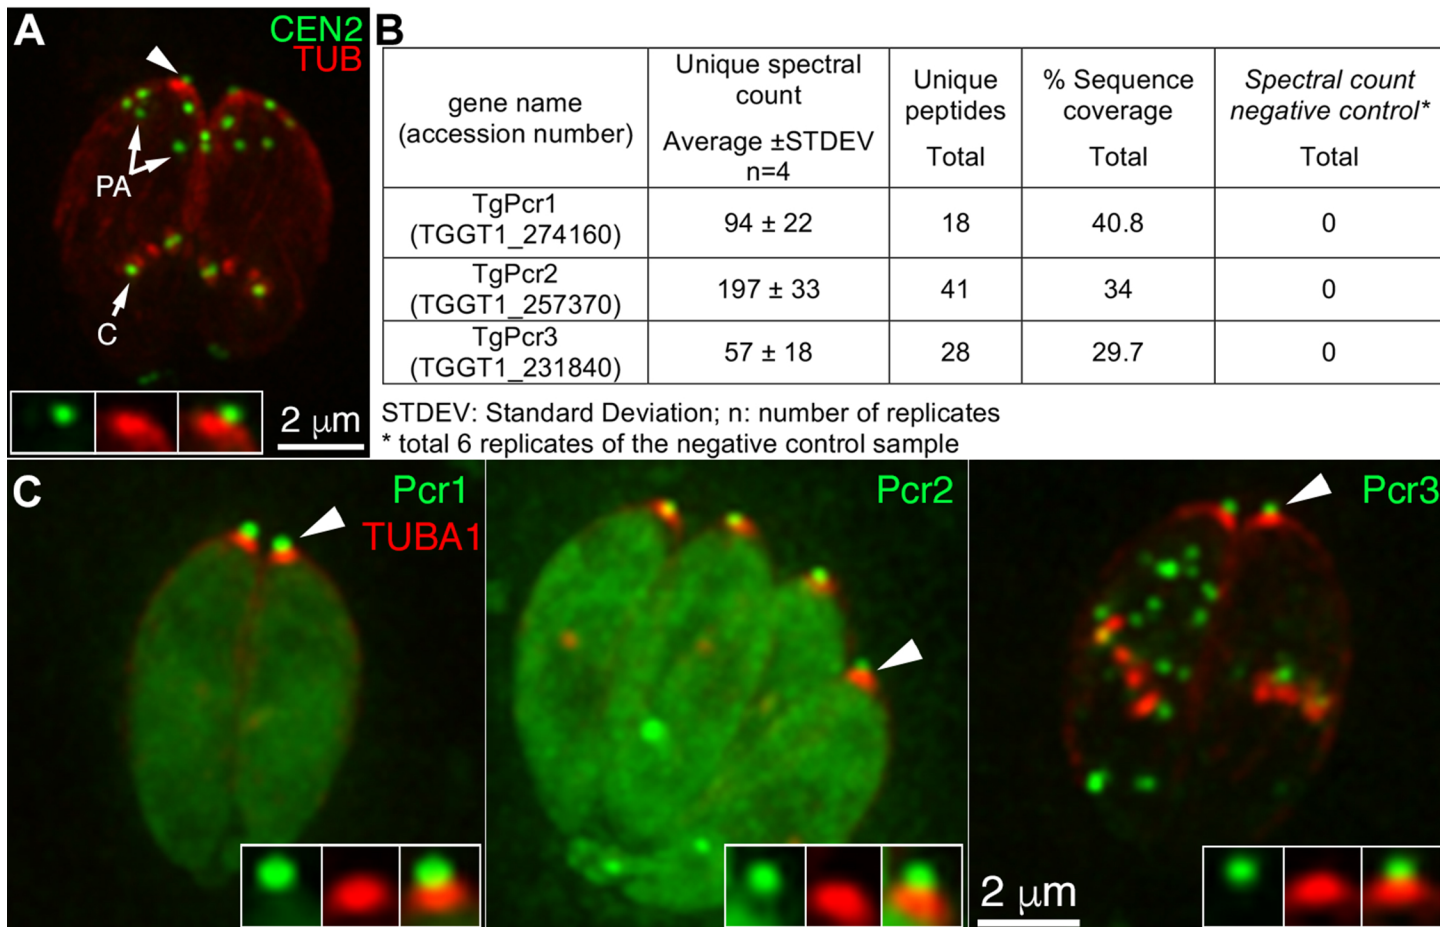

# Figure 3

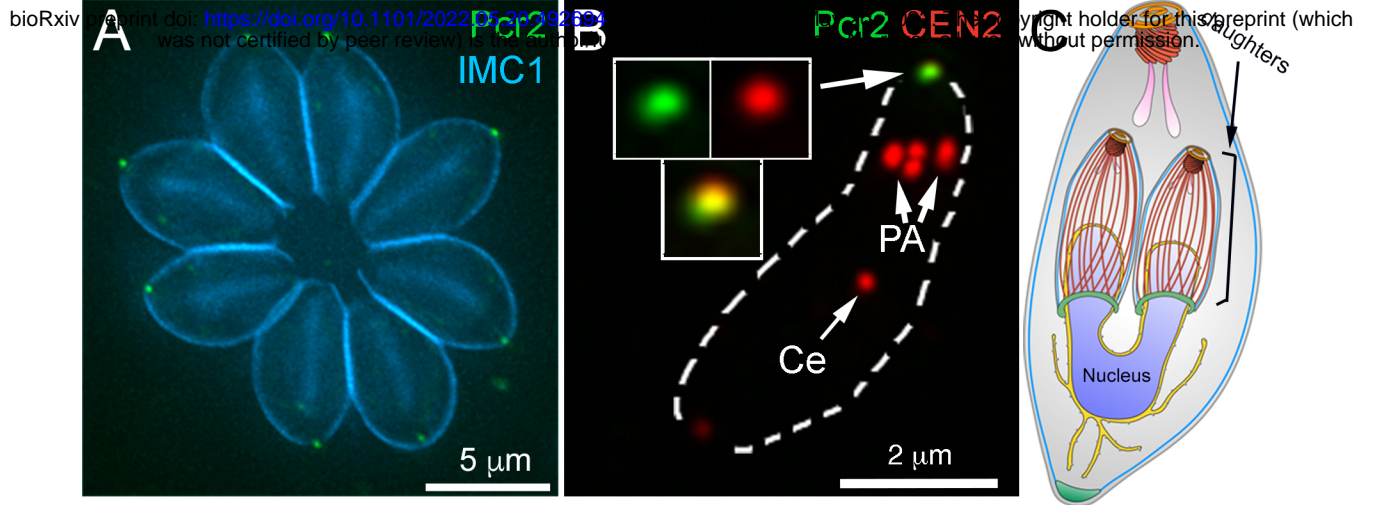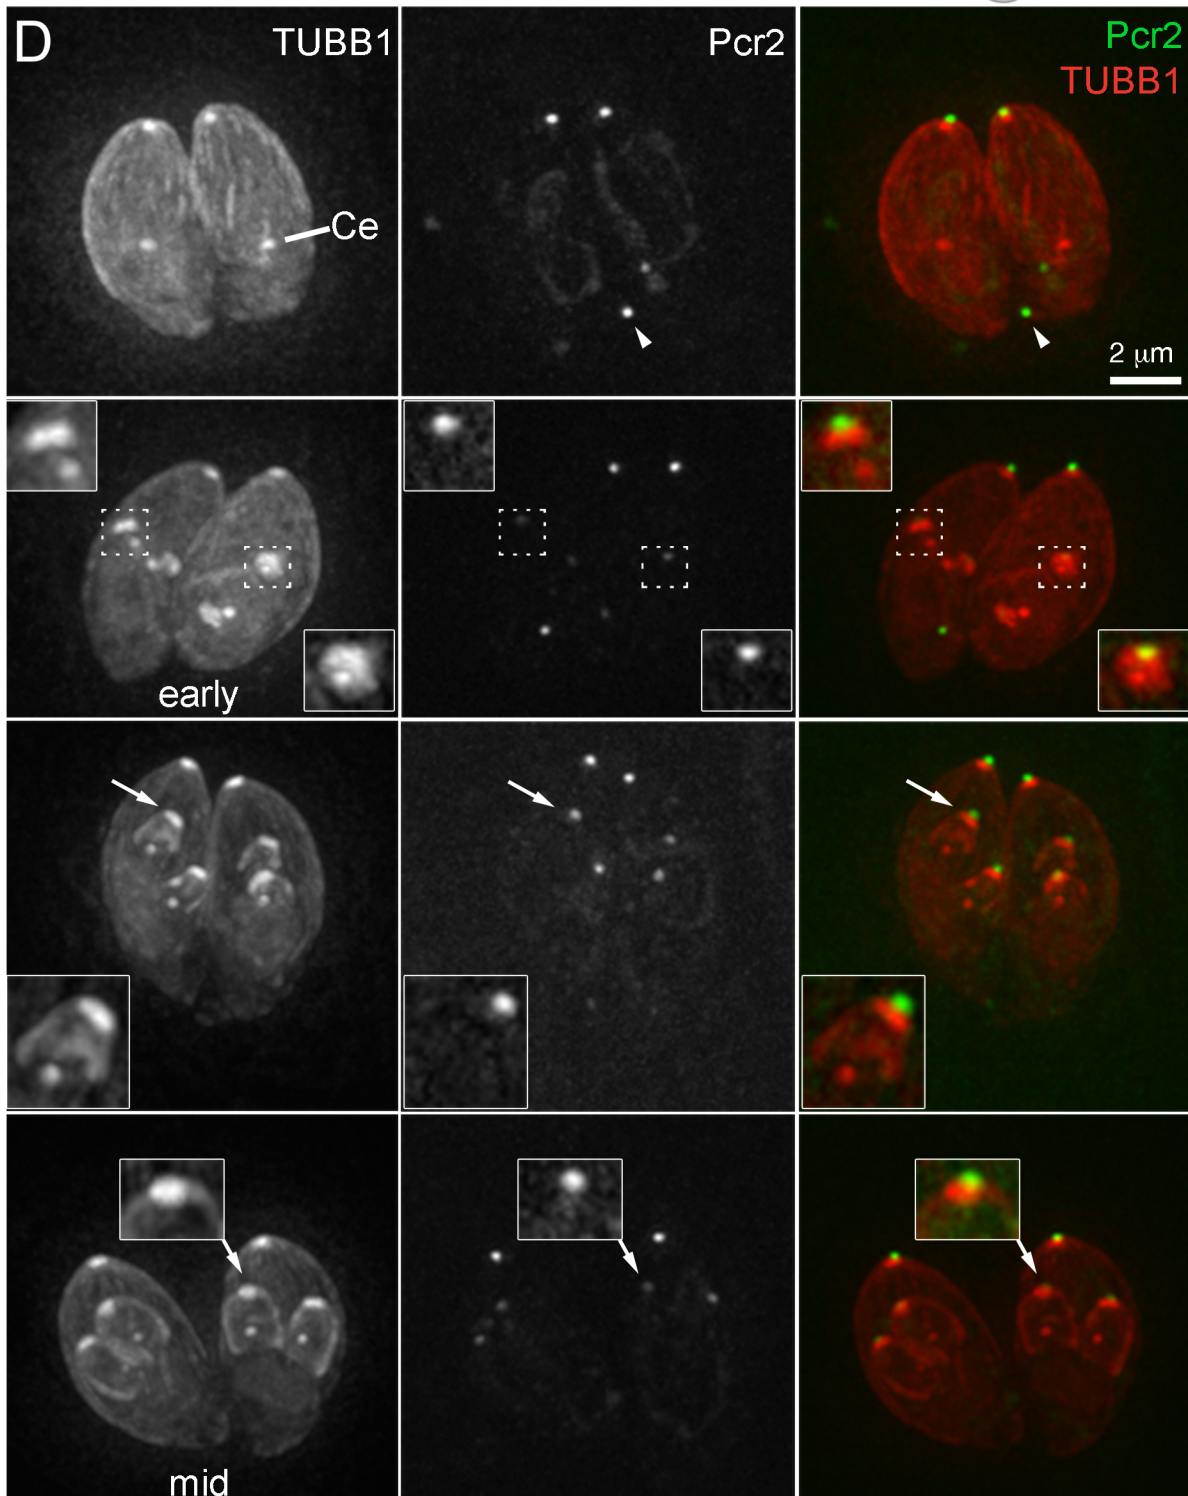



## Figure 4

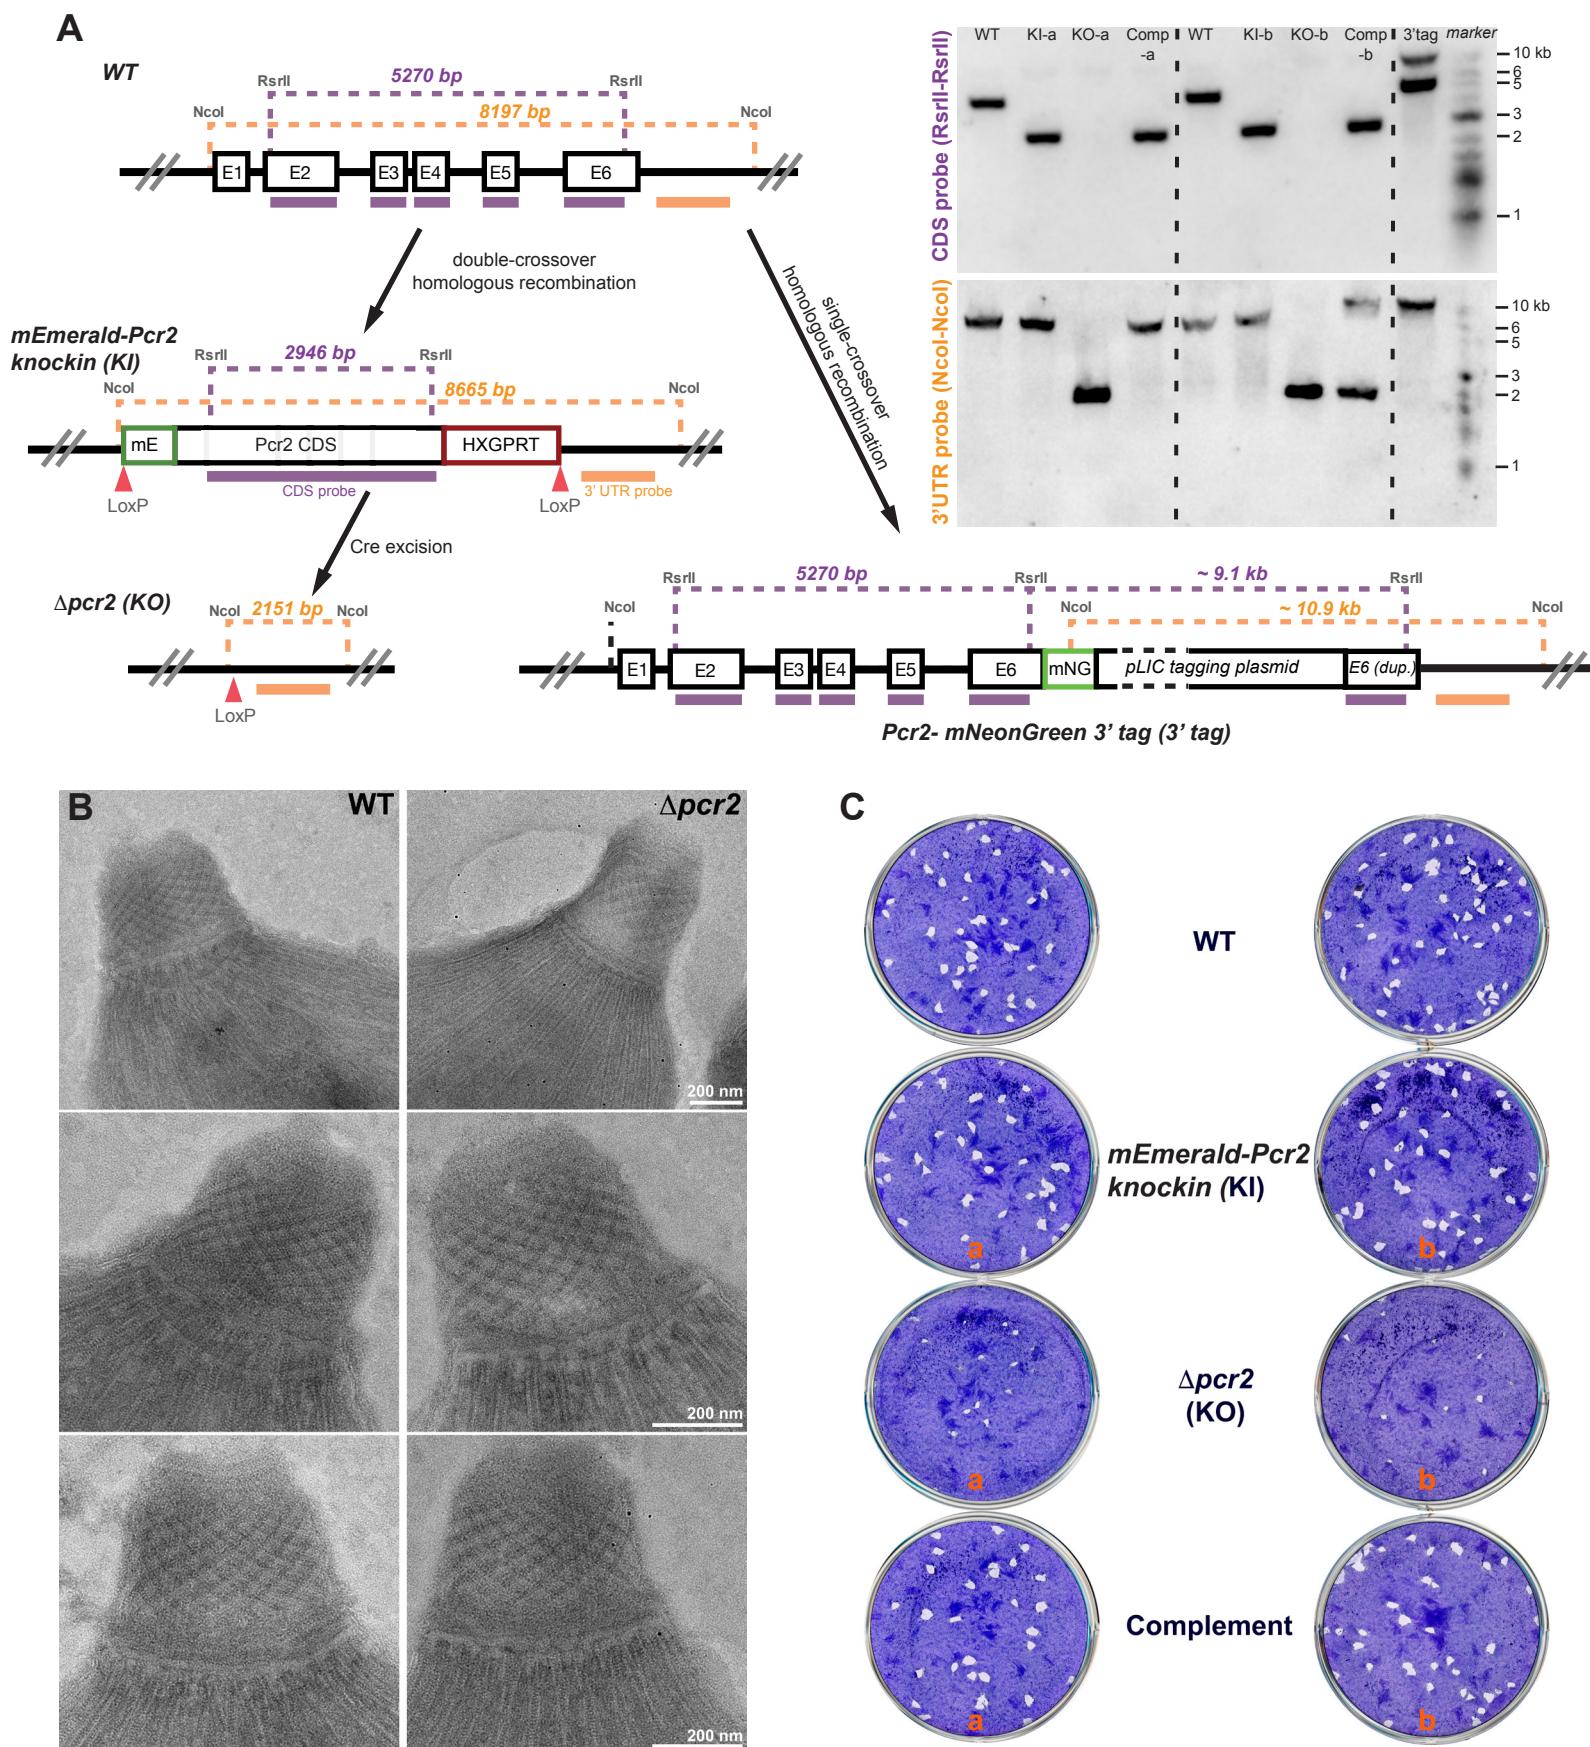



# Figure 5

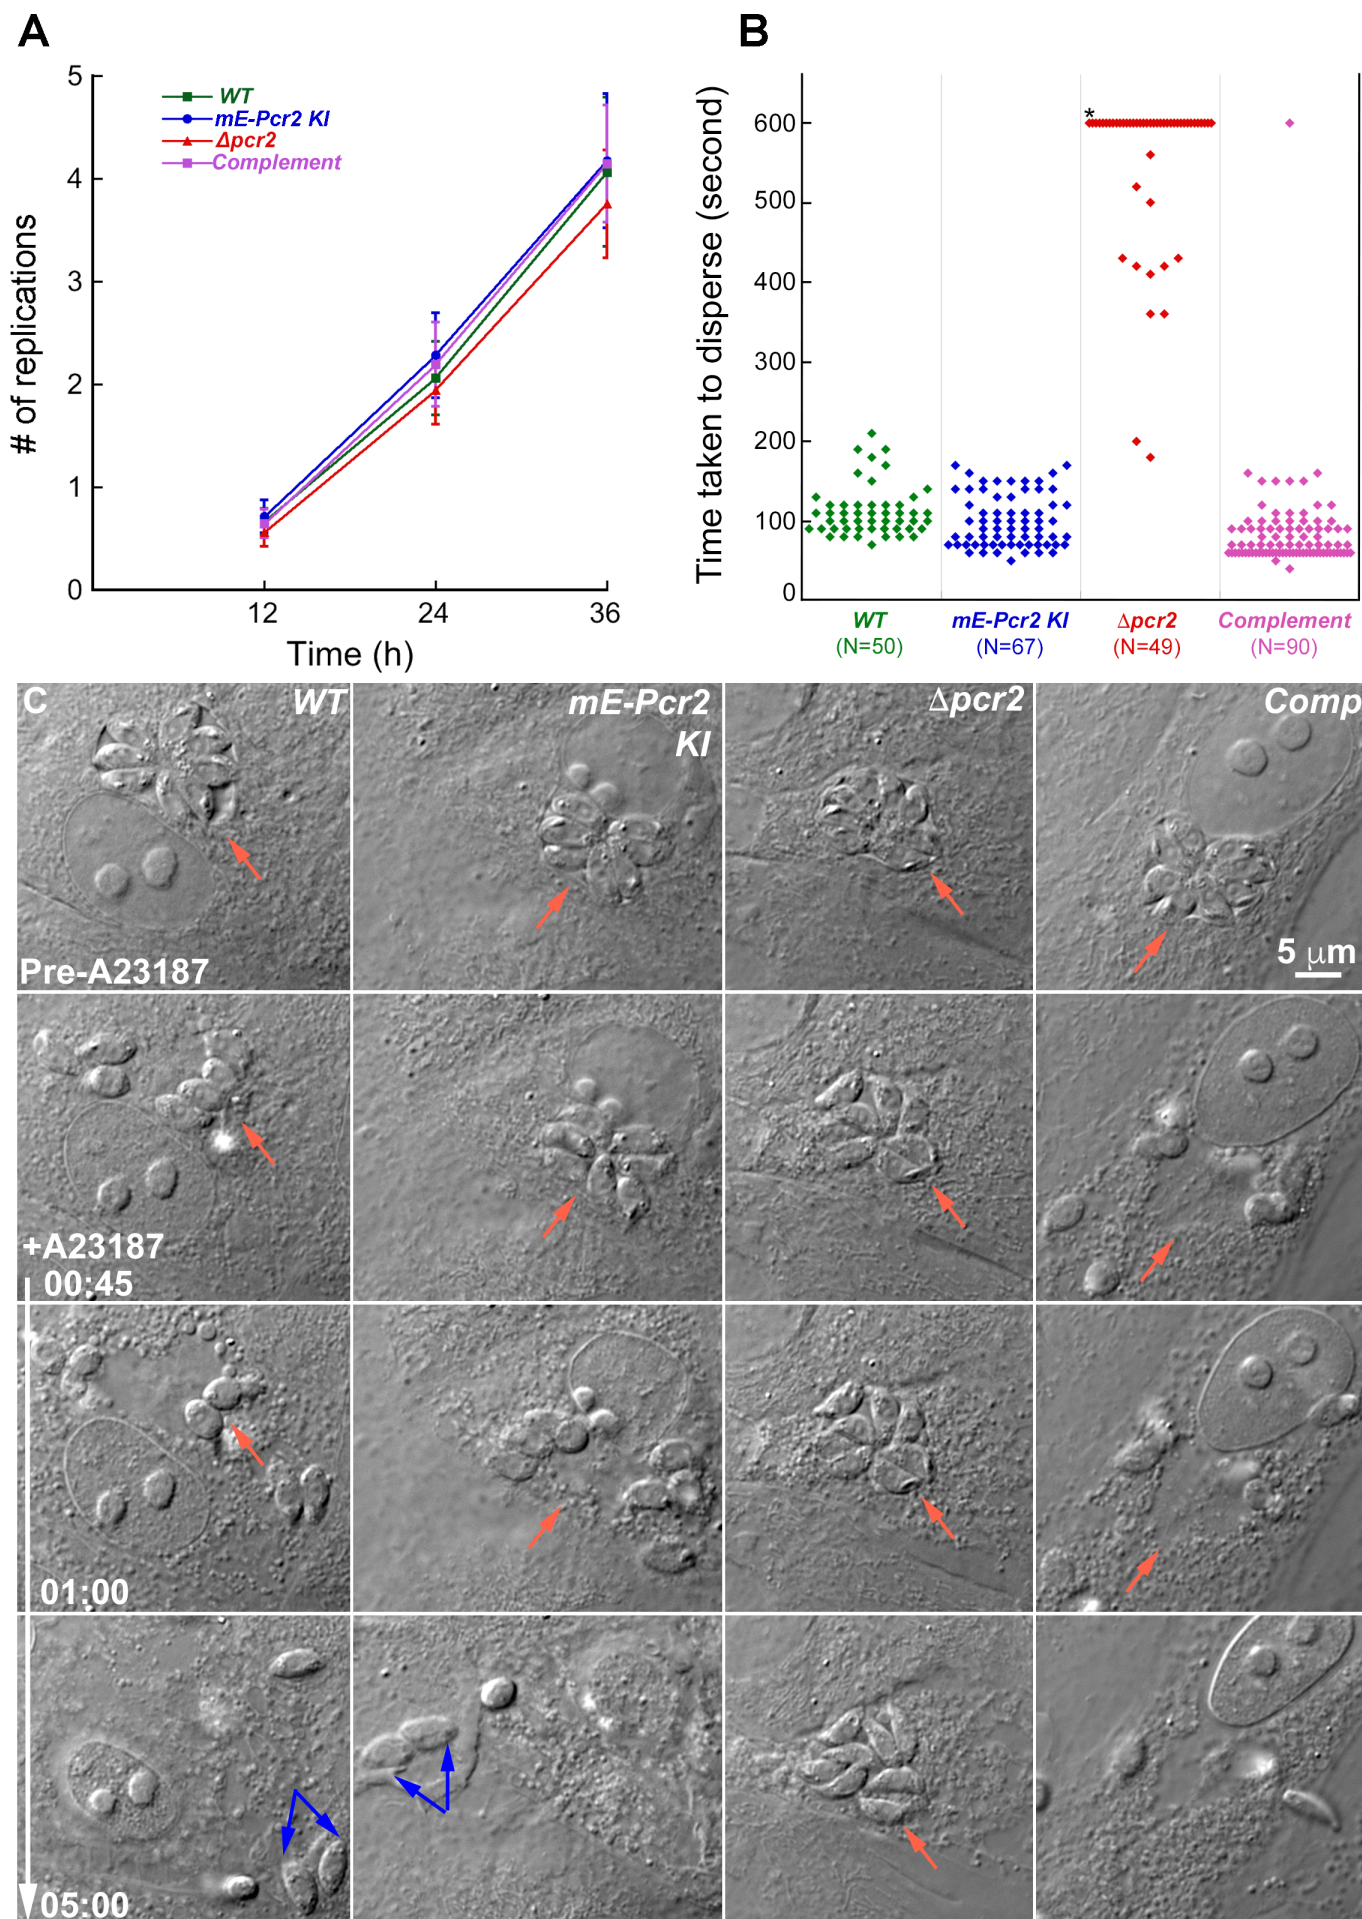



## Figure 6

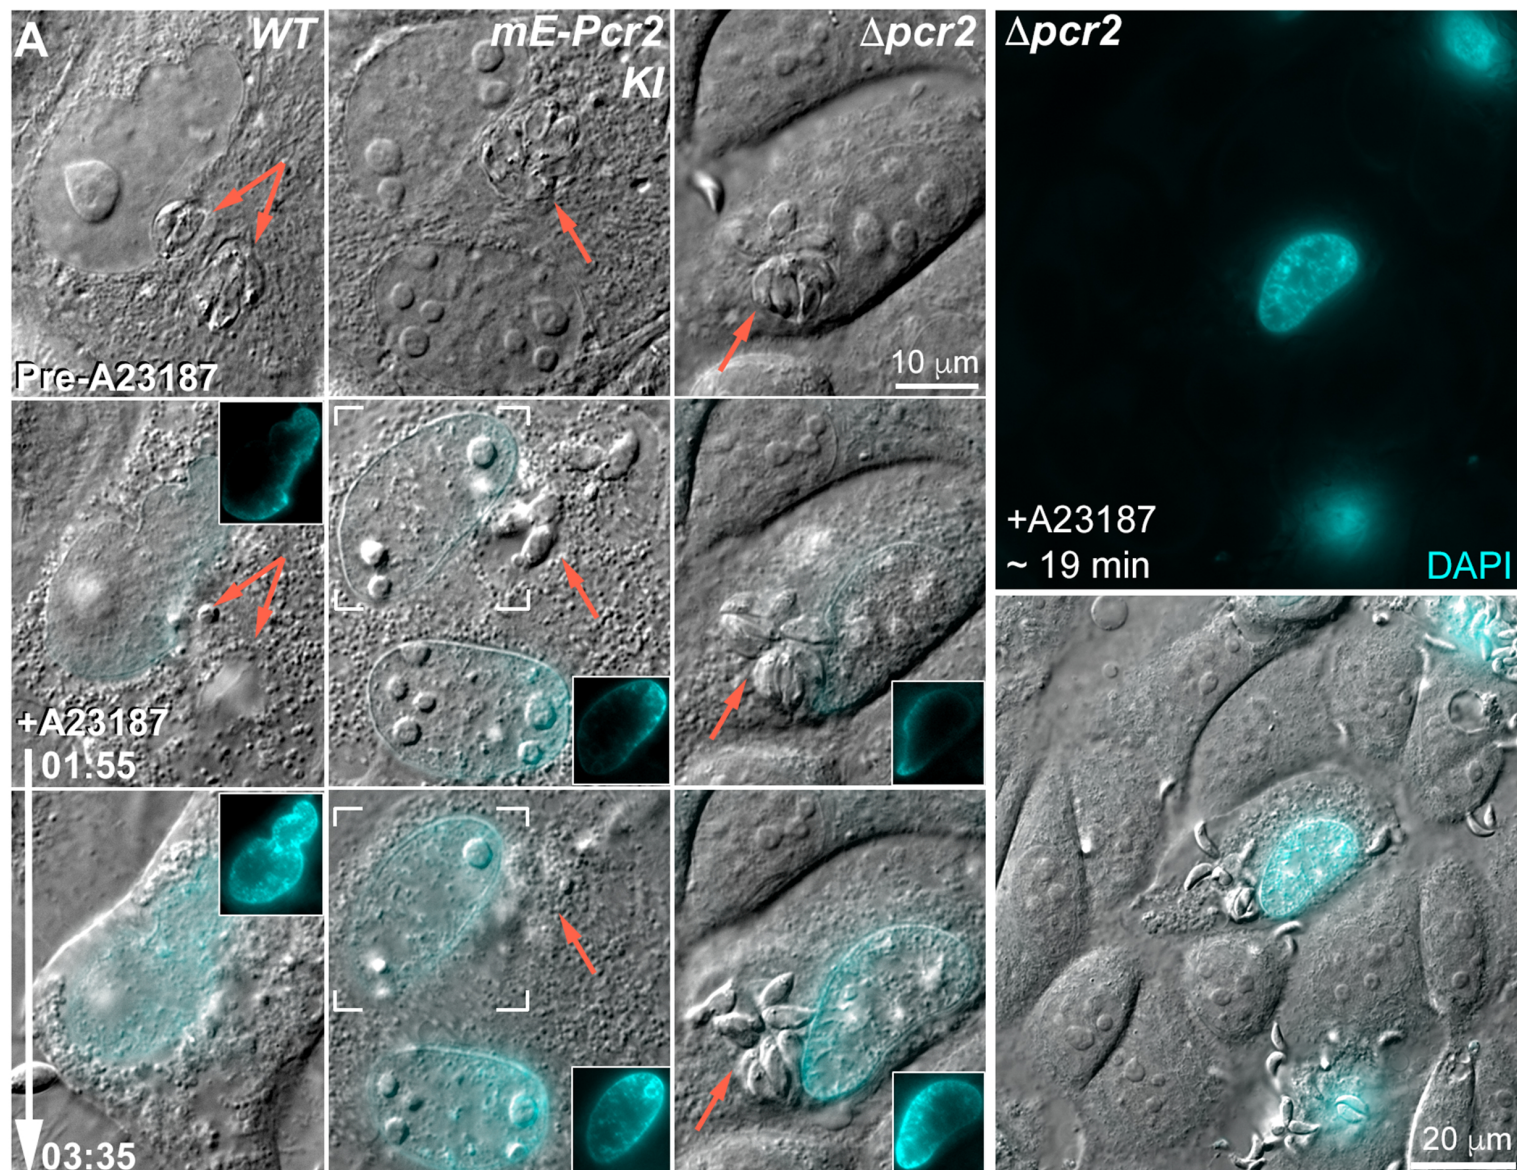

**B**

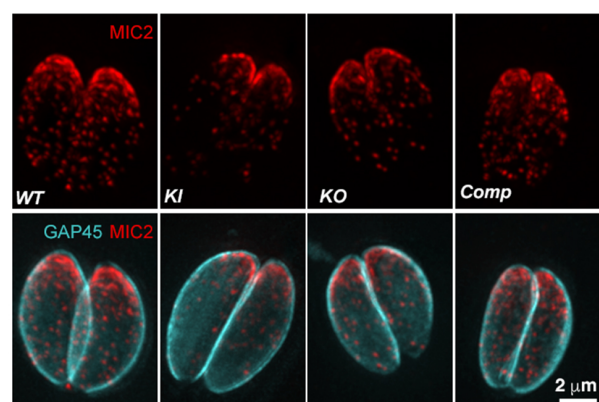

**C**

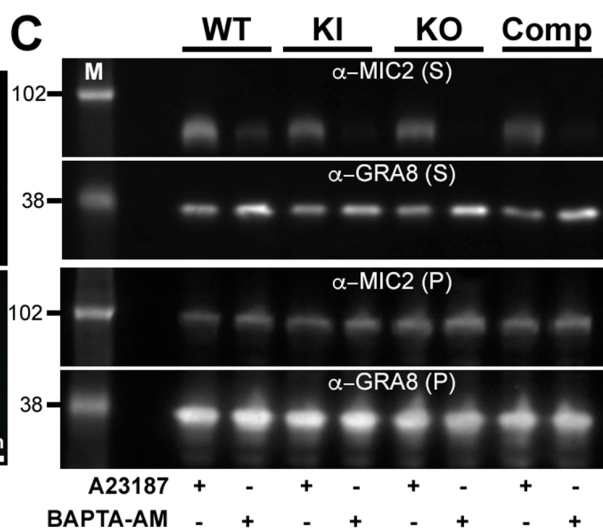

**D**

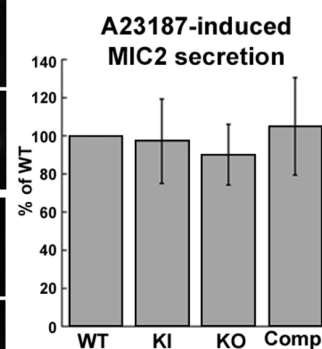



# Figure 7

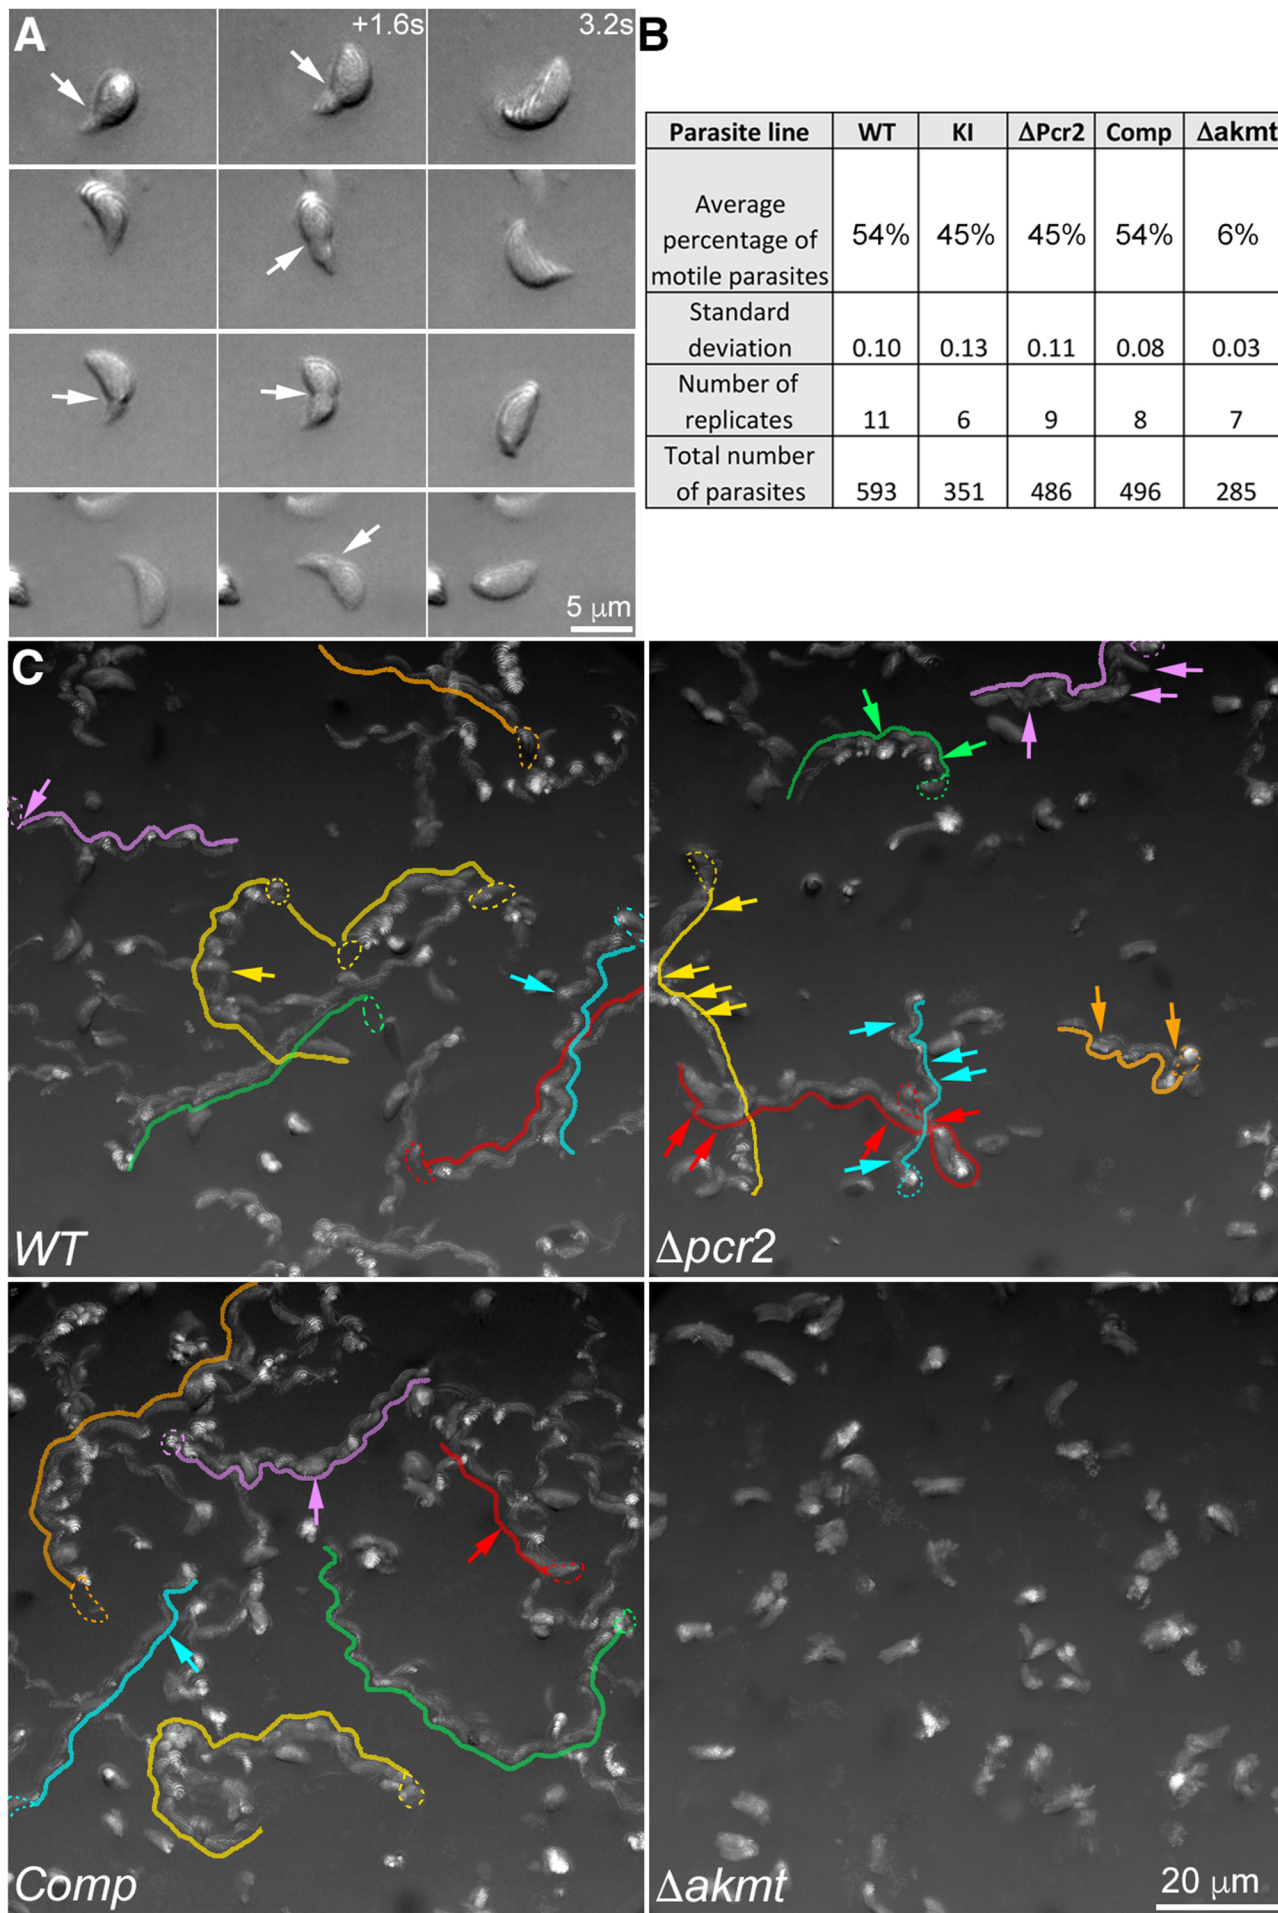



**Figure 8**

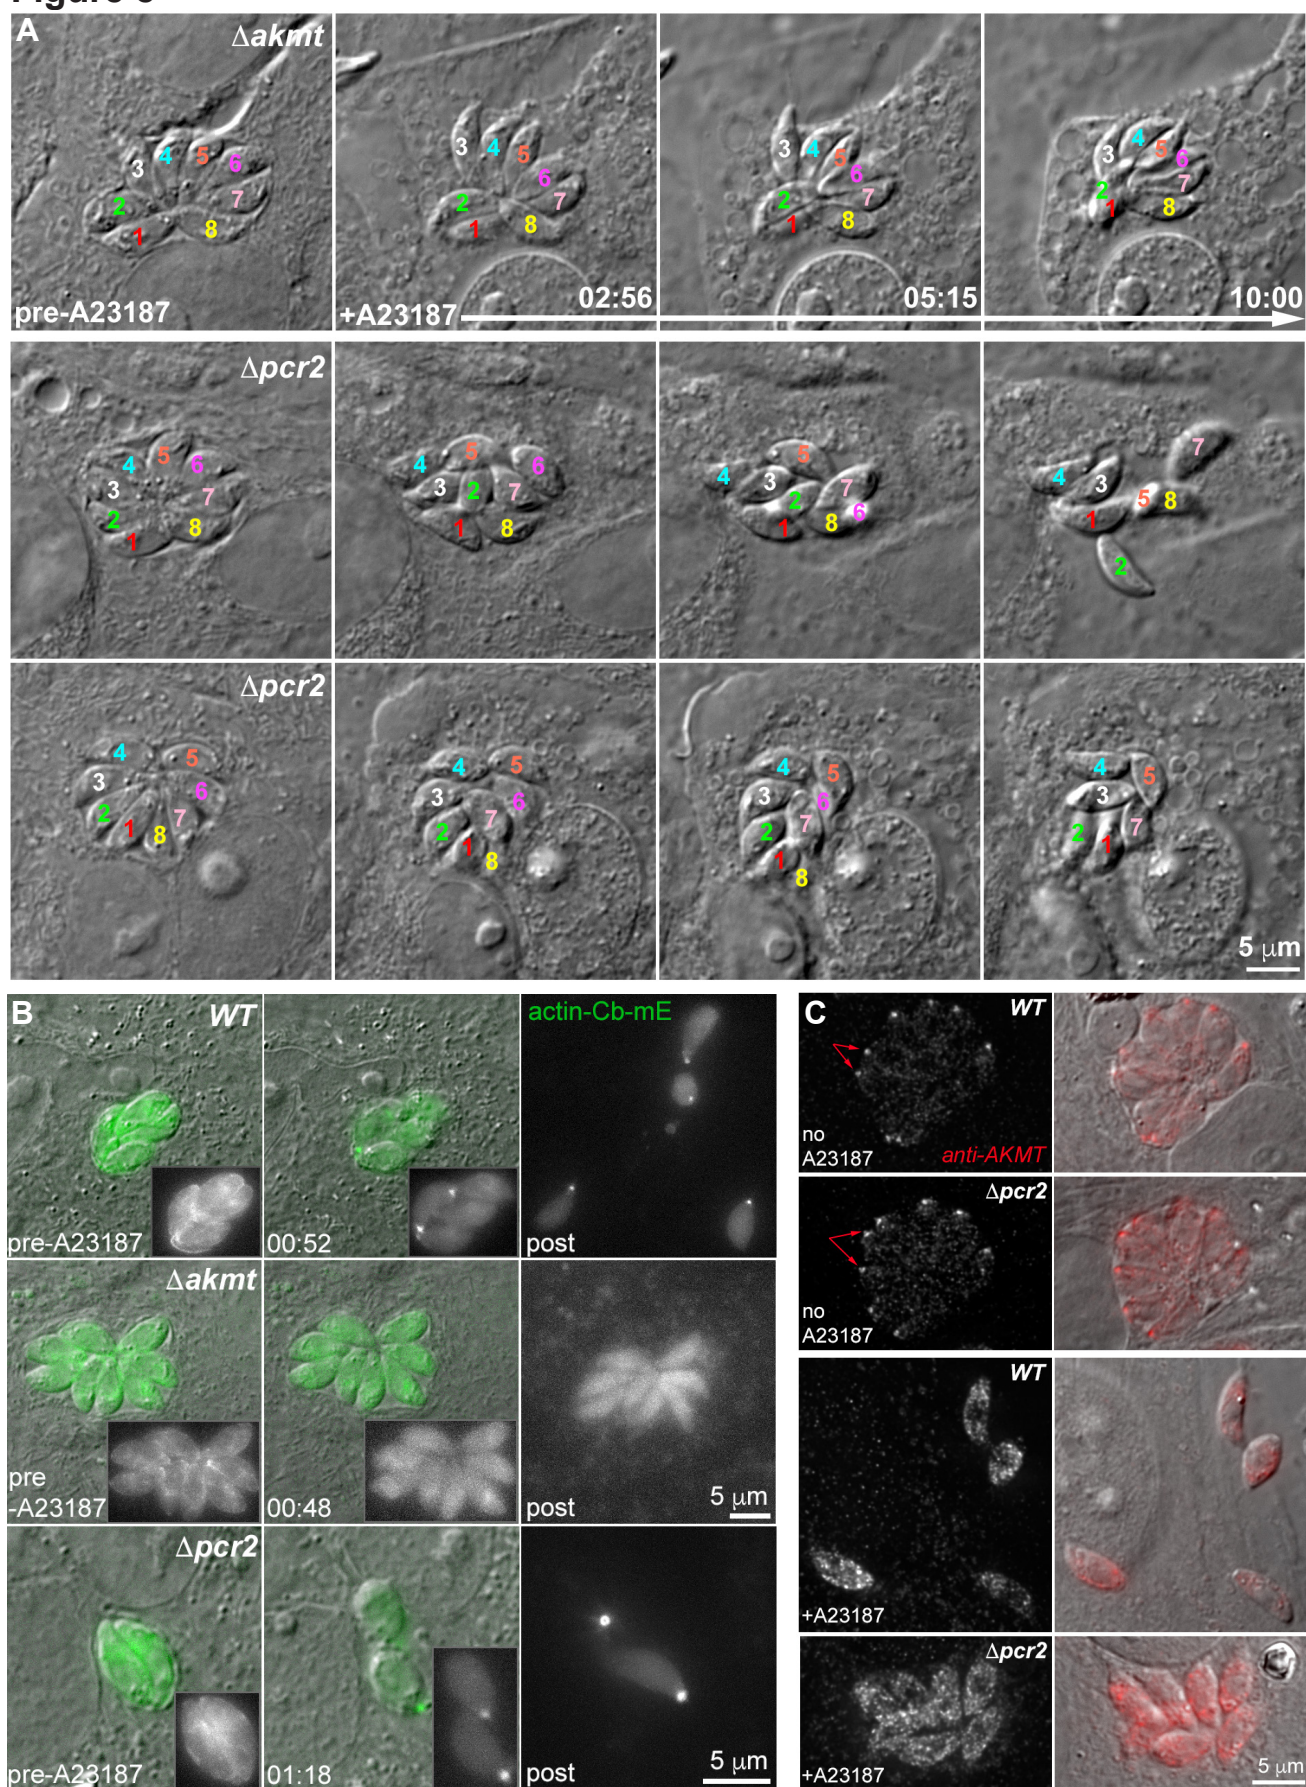



# Figure 9

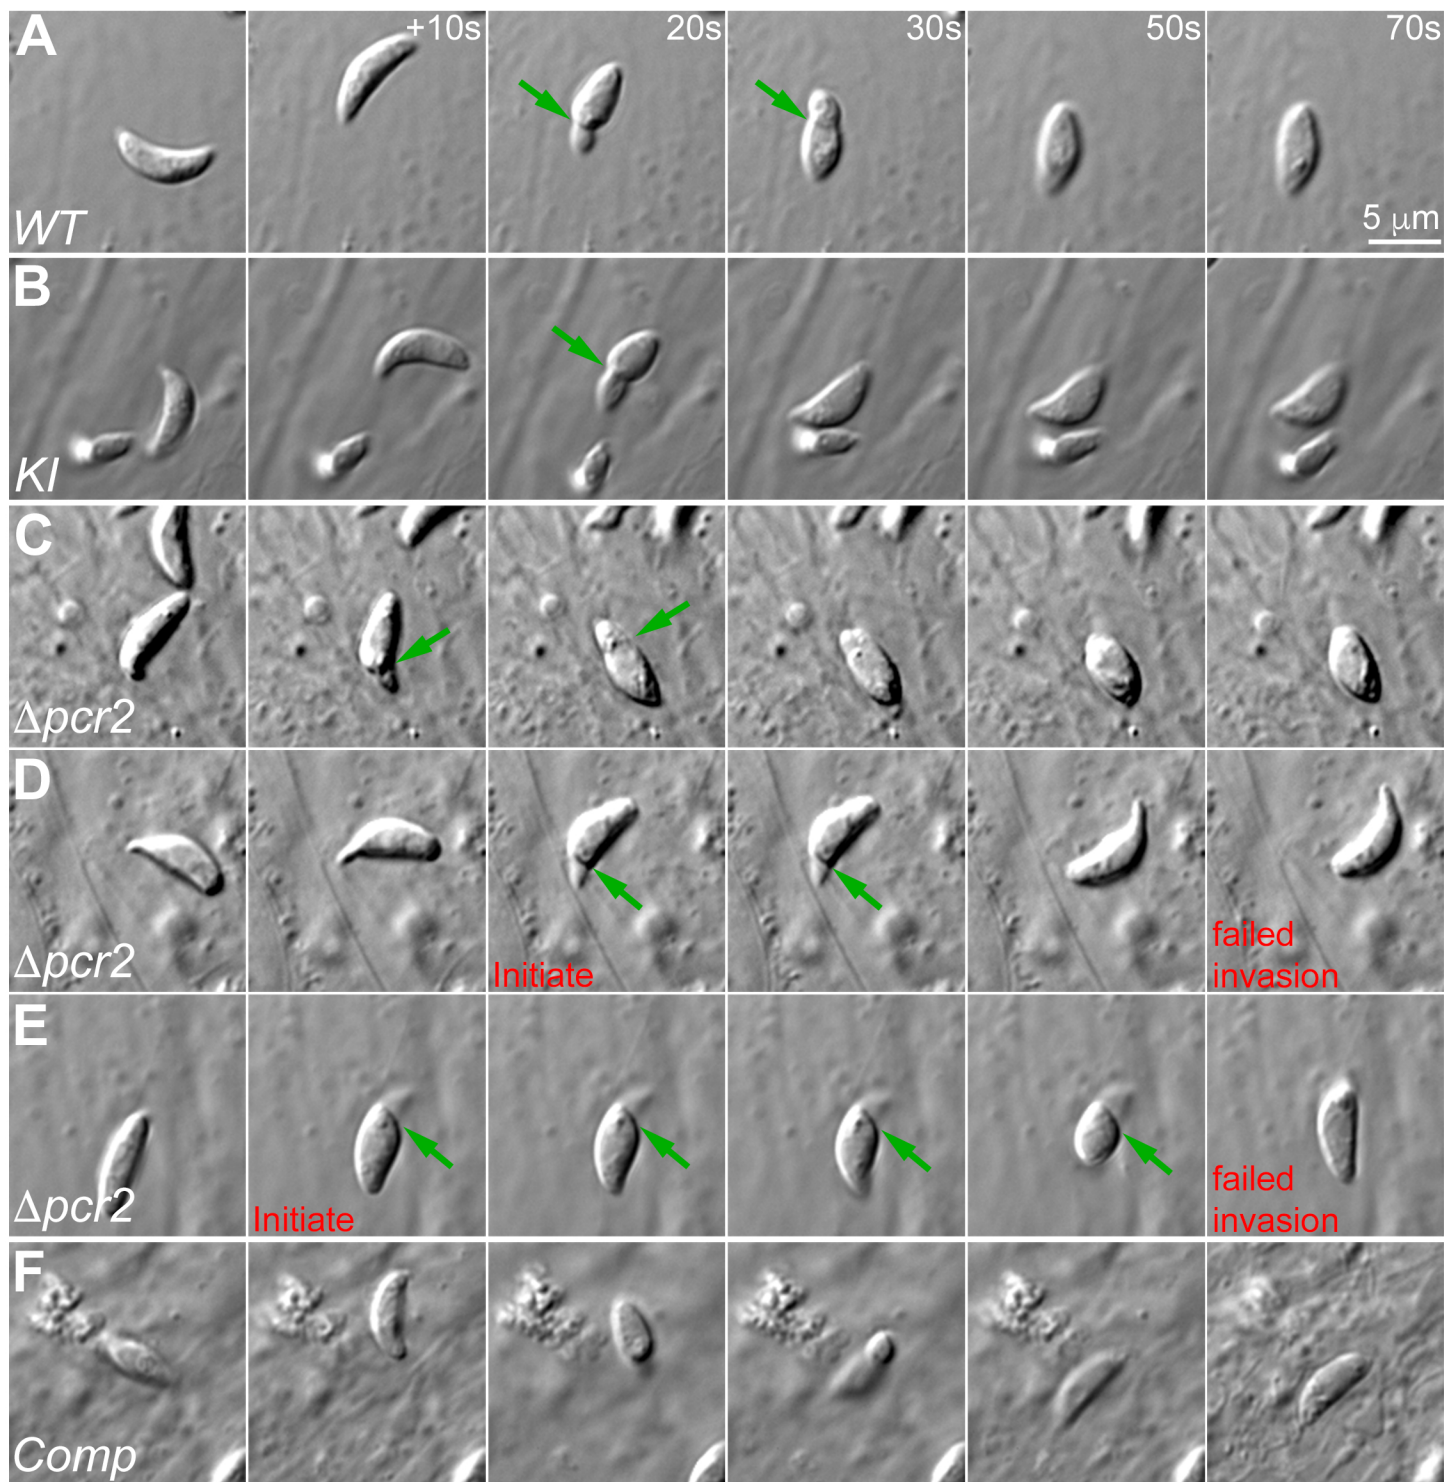

# Figure 10

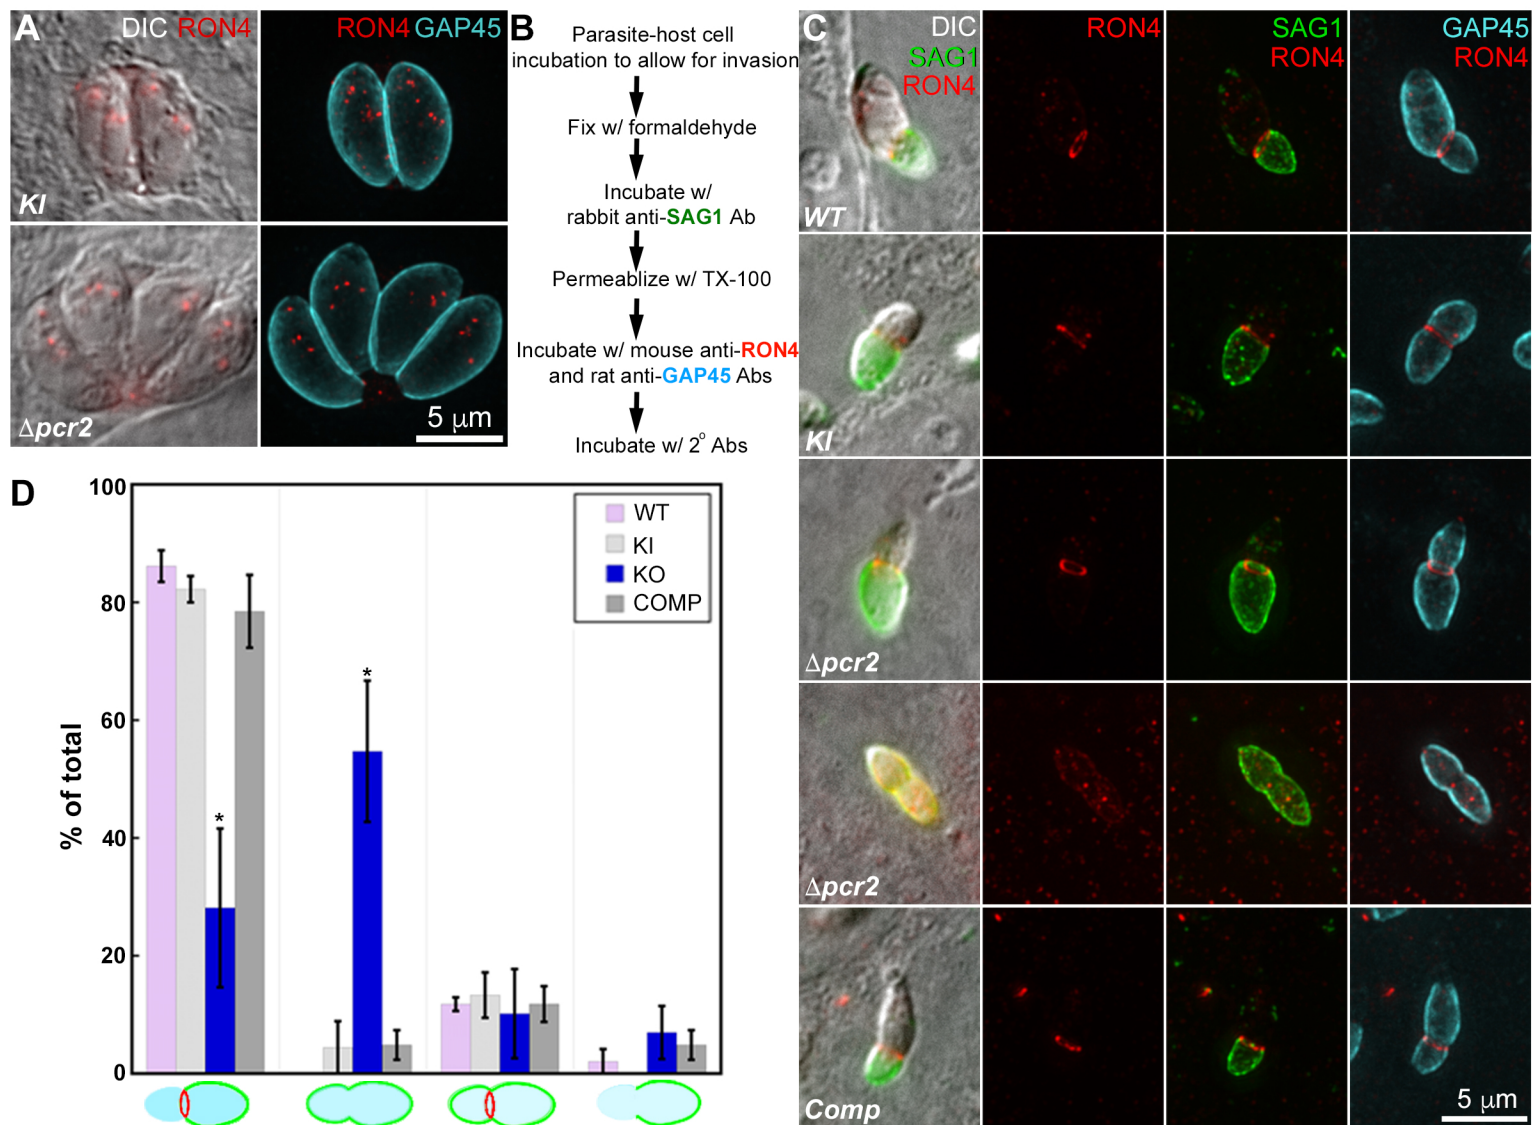

## Figure S1

### TgPcr2 sequence and predicted structure

```
1 MWSLLGFSEESPEESQDATAASPPTPSHQDVPASPSATEGKEVAGVASS
51 ASPETMADAPSDSPATPTSGGGFWSFWGASTPAEAEPAATTPVSTAAA
101 VETPDSGISETPGPSGVSSAAESGGDEKQKKKKKESGKGEAVAEKKK
151 KKESEKGGEMVAEKKKGESEEMSSKLVSGSDVEAFRARLEQIELOKKAK
201 EEAKVKRKEDEKKQKEEKREQRGREREEREKKKQEKAAARI AELKRLEEE
251 LKRITQELAELEKONEERKNKRKGD RGESSSRGSSSSPSSGRSRREASEE
301 RRKAREEREKRRREEQAGLEELLEATERELTETARSLQESIDROREERE
351 LERRRQAQVKREMI RQLAEFATRALEAQQQAARAAA APAPPGASKGQPP
401 APSLVSPADV KARNFMVAL L KRDGGPSLPPPELEQRRLAEPARGETSGAK
451 AEDRQAPELSRKGAAPTAGRVLAE TEVTEGDESMLRPFLAKRGDSVGDE
501 YQEAQYTQQHVIFRGP AFRAFHEL V NATKE INHLKEQVEAASRDEEETIT
551 LRERLOTLLDKETKNSESHLERACAI RQALNSISIVFRAAQRRLKTLFFT
601 KLNAAAGAAAMPRAVGTSAALRA I LGGDSK VTRLGVGLLREVVLRLRQAW
651 NQWTRYVVKPRDAPPGRGAGTG IGTLED EKATAA I MALREVEDEAEALKKY
701 NEEERKRLAEVASRLERWRRQLVA AHDAVIHLRENETKRCKSGVREKERG
751 DRRRPRTSSTLDS AEDDAC APDVLTRLNALVHTEMHR LGLRFENPRAGFG
801 GDSTPHLETRNRDPFRRIP R S FQ TEN IGH L RLLHGDANGSFPEDRLSSFL
851 ESRTSDNGSVRSARGRGVRRRRSLDENGKALSGTESDTSVSES I SSGR
901 SSTSSEGGALSSSEKRRASSRMSGENPSRRNNTVDEGGRRKKNFDKAC
951 EDAE I THDLAPATRGQPSKSGDQASSQVSVVKGTL PASR I VKTRPKPPPP
1001 PGASEPATFGGGQQRKLQPASGTETSQDDLESAPSTRSSCSGKGPKG TGA
1051 PTGSTVIYADA HHTOASAKAKNAVOAKVKMERDROR TAT I VVGAGPPI LA
1101 PKSLVNGPKSGPKPKQ
```

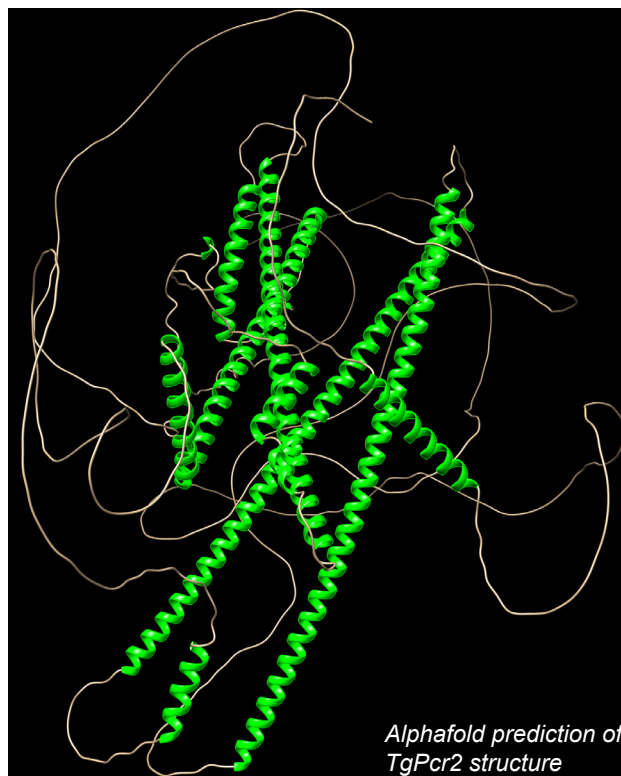

Source: https://www.biorxiv.org/content/10.1101/2022.05.20.492694v1.full.pdf
